1 **New mechanism-based inhibitors of aspartate transcarbamoylase for anticancer**  
2 **drug development**

3 Zhen Lei<sup>1</sup>, Nan Wang<sup>1</sup>, Biying Wang<sup>1</sup>, Zhifang Lu<sup>1</sup>, Hongwei Tan<sup>1</sup>, Jimin Zheng<sup>1\*</sup>,  
4 Zongchao Jia<sup>2\*</sup>

5

6 <sup>1</sup>College of Chemistry, Beijing Normal University, Beijing, 100875, China

7 <sup>2</sup>Department of Biomedical and Molecular Sciences, Queen's University, Kingston,  
8 Ontario, K7L3N6, Canada

9 \*To whom correspondence should be addressed. Tel: +86-010-58806002; Email:  
10 jiminz@bnu.edu.cn (Jimin Zheng), jia@queensu.ca (Zongchao Jia).

11 **Abstract**

12 Aspartate transcarbamoylase (ATCase) is a key enzyme which regulates and catalyzes  
13 the second step of *de novo* pyrimidine synthesis in all organisms. *E. coli* ATCase is a  
14 prototypic enzyme regulated by both product feedback and substrate cooperativity,  
15 whereas human ATCase is a potential anticancer target. Through structural and  
16 biochemical analyses, we revealed that R167/130's loop region in ATCase serves as a  
17 gatekeeper for the active site, playing a new and unappreciated role in feedback  
18 regulation. Based on virtual compound screening simultaneously targeting the new  
19 regulatory region and active site of human ATCase, two compounds were identified to

20 exhibit strong inhibition of ATCase activity, proliferation of multiple cancer cell lines,  
21 and growth of xenograft tumors. Our work has not only revealed a previously  
22 unknown regulatory region of ATCase that helps explain feedback regulation, but also  
23 successfully guided the identification of new ATCase inhibitors for anticancer drug  
24 development using a dual-targeting strategy.

## 25 **Introduction**

26 The *de novo* pyrimidine synthesis pathway is conserved in all organisms (Evans &  
27 Guy, 2004, Jones, 1980, Lee, Kelly et al., 1985), in which the first three steps are  
28 catalyzed by carbamoyl phosphate synthetase (CPSase), aspartate transcarbamoylase  
29 (ATCase), and dihydroorotase (DHOase), respectively. CPSase initiates the pathway  
30 by catalyzing the formation of carbamoyl phosphate (CP), ATCase transmits the  
31 carbamoyl of CP onto Asp to produce carbamoyl aspartate (CA), and DHOase  
32 condensates CA to dihydroorotate. Among the three enzymes, ATCase has been  
33 extensively studied, especially ecATCase-holo, which is referred as a textbook  
34 example for cooperativity effect and feedback regulation (Kantrowitz, 2012,  
35 Lipscomb & Kantrowitz, 2012) (all abbreviations related to ATCase used in this paper:  
36 ecATCase-holo for *E. coli* ATCase holoenzyme, apo-ecATCase-holo for apo form *E.*  
37 *coli* ATCase holoenzyme, and PALA-ecATCase-holo for PALA binding form *E. coli*  
38 ATCase holoenzyme; ecATCase for *E. coli* ATCase, apo-ecATCase for apo form *E.*  
39 *coli* ATCase, and PALA-ecATCase for PALA binding form *E. coli* ATCase; huATCase

40 for human ATCase, apo-huATCase for apo form human ATCase, and  
41 PALA-huATCase for PALA binding form human ATCase). In brief, ecATCase-holo is  
42 comprised of 2 catalytic trimers and 3 regulatory dimers, and it can adopt two  
43 different states at quaternary level: a low activity and low-affinity tense state (T state)  
44 and high activity and high affinity relax state (R state). High concentration of the  
45 second substrate, Asp, triggers a domain closure of ATCase which subsequently  
46 facilitates the transition from T to R state, termed cooperativity effect (Howlett &  
47 Schachman, 1977, Krause, Volz et al., 1987). The regulatory subunits can bind  
48 different nucleotides, causing a positive or negative effect on the activity of  
49 ecATCase-holo, termed feedback regulation (Gerhart & Pardee, 1962, Wild,  
50 Loughrey-Chen et al., 1989). Differently from ecATCase which is encoded separately  
51 and functions independently, huATCase is fused into CAD with CPSase and DHOase,  
52 but it exhibits high conservation among primary, secondary, and tertiary structures  
53 with ecATCase (Ruiz-Ramos, Velazquez-Campoy et al., 2016). Additionally, feedback  
54 regulation and cooperativity effect are also believed to exist in CAD  
55 (Moreno-Morcillo, Grande-Garcia et al., 2017, Serre, Penverne et al., 2004).

56

57 The feedback regulation of ATCase is an important means that helps organisms  
58 balance the levels of pyrimidines and purines in cells. CTP and UTP, the end products  
59 of *de novo* pyrimidine synthesis pathway, inhibit the activity of ATCase, whereas ATP  
60 and GTP promote it. For ecATCase-holo, the binding of pyrimidines or purines not

61 only influences the  $V_{\max}$ , but also causes a pronounced change of  $K_m$  (Cockrell,  
62 Zheng et al., 2013). In other words, pyrimidines or purines change the difficulty level  
63 for ecATCase-holo to transit from T to R state. Nevertheless, it is yet to be elucidated  
64 how pyrimidines and purines exert their effects because they bind at a position far  
65 away from the active site and ATCase structures bound with pyrimidines or purines do  
66 not show obvious differences. For ecATCase-holo, the distance between the binding  
67 position and the active site is  $\sim 60$  Å. In the case of CAD, although the exact distance  
68 remains unknown due to the lack of CAD structure, the distance would also be very  
69 long because effectors are considered to bind with CPSase of CAD (Serre et al., 2004),  
70 which is far away from the active site of ATCase (Moreno-Morcillo et al., 2017).  
71 There must be some sort of yet unknown transmission mechanism which enables the  
72 regulation.

73

74 Zooming in the active site of ATCase, many completely conserved and  
75 positively-charged residues stabilize the negatively-charged substrates, CP and Asp,  
76 including K84 from an adjacent monomer, H134, and several arginines - R54, R105,  
77 R167, and R229. Among these arginines, R167 is located at the substrate entrance  
78 point or gate of the active site. In most ATCase structures, R167 faces inward toward  
79 the active pocket (which we call R167 “in” state), whereas a handful of ATCase  
80 structures show that R167 side chain protrudes away and is positioned outside the  
81 active site pocket (which we call R167 “out” state). R167 “in” state plays several key

82 roles for ATCase, one of which is stabilizing the substrate and/or the intermediate  
83 product (Gouaux & Lipscomb, 1990, Gouaux, Stevens et al., 1990, Ke, Lipscomb et  
84 al., 1988). The domain closure of ATCase is also closely related with R167 “in” state,  
85 the occurrence of which relies on the formation of interactions among E50, R167, and  
86 R234 at R167 “in” state (Kantrowitz & Lipscomb, 1988, Ladjimi & Kantrowitz,  
87 1988), and domain closure cannot occur when R167 adopts “out” state. Despite of the  
88 comprehensive realization about R167 “in” state, the R167 “out” state has seemed to  
89 be so far largely neglected and the only study reported has to do with the so-called  
90 “extreme T” state (Huang & Lipscomb, 2004). The role of R167 “out” in ATCase is  
91 another puzzle that has to be settled. Besides R167, there is a short flexible loop  
92 (residues A127 to H134, which we call 130’s loop) interacting with and stabilizing  
93 R167 “in” or “out” state, which further interacts with regulatory subunit in the case of  
94 ecATCase-holo. Apart from the known location of 130’s loop at the interface between  
95 the active site and the regulatory subunit, its role also remains completely unclear.

96

97 Due to the key role of CAD in pyrimidine synthesis, its activity is upregulated in  
98 cancer cells to accommodate the high demand for nucleotides (Aoki & Weber, 1981).  
99 Thus, huATCase of CAD is a potential target for anticancer therapy. In fact, attempts  
100 have been made to use N-phosphonacetyl-L-aspartate (PALA), an analog of the  
101 reaction intermediate of ATCase, as an anticancer drug. Unfortunately, it failed in  
102 clinical trials (Grem, King et al., 1988), although it exhibited inhibition of huATCase

103 and the proliferation of colonic cancer cell line, and extension of mean survival time  
104 of mice (Swyryd, Seaver et al., 1974, Tsuboi, Edmunds et al., 1977). The recently  
105 solved huATCase structure provided a partial rationalization for the failure  
106 (Ruiz-Ramos et al., 2016). Briefly, in the huATCase, the domain closure of one  
107 catalytic chain caused by the binding of the first PALA affects the conformation of the  
108 other two active sites in the trimer, resulting in increasingly more difficult binding of  
109 the second and third PALA. This situation would be even more pronounced in the  
110 case of CAD. Owing to the negative cooperativity of binding, PALA can only  
111 partially inhibit the activity of huATCase. Additionally, low dose of PALA is also very  
112 likely to become an activator for huATCase when assembled in CAD, as is the case in  
113 ecATCase-holo, which would make it very difficult to control a proper PALA dosing  
114 during clinical trials. The clear disadvantage of PALA warrants seeking novel  
115 inhibition strategies and new inhibitors, which would target the apo form human  
116 ATCase (apo-huATCase) and would ideally not trigger the domain closure.

117

118 Herein we report several crystal structures of ecATCase and ecATCase-holo including  
119 a wild-type apo-ecATCase-holo, in which R167 “out” state clearly observed. This  
120 represents the first case of R167 “out” conformation in an ecATCase-holo structure in  
121 absence of any mutations or ligand binding in active site. By structural comparison  
122 and analysis, we firstly observed a region of R167/130’s loop located at the interface  
123 of active site and regulatory subunit that may play a key role in feedback regulation of

124 ATCase. We investigated the region using various approaches including  
125 crystallography, enzymology, dynamic simulation and isothermal titration calorimetry  
126 etc., and demonstrated that R167 needs to switch between “in” and “out” state during  
127 the catalytic process of ATCase to guide the entrance of Asp and help the release of  
128 carbamoyl aspartate. In addition, the conformational change of R167 is under the  
129 regulation of 130’s loop and the latter was further affected by the regulatory subunit in  
130 the case of ecATCase-holo. Therefore, we considered that this region act as a  
131 modulator in response to the signal transmitted from nucleotides binding. This  
132 standpoint is also supported by previous literature (Eisenstein, Markby et al., 1989).  
133 Since huATCase is a potential target for anticancer drugs, we, taking advantage of the  
134 newly discovered feedback regulatory mechanism, performed a virtual compound  
135 screening simultaneously targeting both the newly found regulatory region and the  
136 active site of apo-huATCase. Two compounds from the top hit list exhibited strong  
137 inhibition of both huATCase activity and the proliferation of multiple cancer cell lines.  
138 Mice xenograft tumor experiments also yielded promising results. Our work revealed  
139 a new feedback regulatory mechanism of ATCase, which successfully guided us to  
140 obtain inhibitors of ATCase for new anticancer drugs development using a  
141 dual-targeting strategy.

142 **Results**

143 **The R167 “out” structure of ecATCase-holo helps uncover a previously neglected**  
144 **regulatory region of ATCase**

145 The structure of ecATCase-holo obtained here is virtually identical to other  
146 ecATCase-holo structures in T state, except for the conformation of R167 (Fig 1A and  
147 B). In the structure, R167 extends outwards of the ATCase active site, which we term  
148 R167 “out” to distinguish from R167 “in” state. By analyzing all reported  
149 ecATCase-holo structures (Appendix Table S1), we found only four other structures  
150 that adopt this R167 “out” state, two of which (PDB ID: 9ATC and 4E2F) have  
151 mutations destabilizing R state of ecATCase-holo (Guo, West et al., 2012, Ha &  
152 Allewell, 1998, Newell & Schachman, 1990) and the other two (PDB ID: 1R0C and  
153 2AIR) bind with substrate analogs or products in an unusual way (Huang & Lipscomb,  
154 2004, Huang & Lipscomb, 2006). Thus, the structure we report here is the first  
155 wild-type apo form *E. coli* ATCase holoenzyme (apo-ecATCase-holo, and  
156 apo-ecATCase for apo form *E. coli* ATCase) with R167 “out” state, which clearly  
157 demonstrates that ecATCase-holo can adopt R167 “out” state without the influence of  
158 other factors. Because of the close proximity and multiple interactions between 130’s  
159 loop and R167, we investigated R167 together with 130’s loop. The fact that R167  
160 can adopt both “in” and “out” state indicates a certain degree of flexibility of this  
161 region. Considering that this region is located at the gate of active site of ATCase, we



162 speculated that this region may play a regulatory role in the catalytic process of  
163 ATCase.

164 **Mutations that reduce the flexibility of R167/130's loop significantly decrease the**  
165 **enzymatic activity of ATCase**

166 To investigate the importance of the flexibility of R167/130's loop, we attempted to  
167 alter local flexibility by introducing mutations and monitor their effects on enzymatic  
168 activity. G166, which is next to R167, was mutated to alanine or proline and glycines  
169 in the 130's loop were changed to alanines, either individually or together. In this  
170 assay, ecATCase, ecATCase-holo, and huATCase were examined, and corresponding  
171 wild-type and R167A ATCase (similar mutation was previously shown to cause a  
172 dramatic decrease of ATCase activity (Stebbins, Zhang et al., 1990)) were used as  
173 positive and negative control, respectively. Our results from the aforementioned  
174 rigidification-causing mutants display a clear trend of significantly decreased  
175 enzymatic activity and even complete loss in some cases (Fig 2). For example, G166A  
176 mutant retained some activity but G166P mutant (the most rigid mutation) almost  
177 completely lost activity. A similar situation is seen in 130's loop. Single glycine to  
178 alanine mutants exhibited partial activity, while mutations of two glycines to alanines  
179 resulted in almost complete loss of activity, just like the R167A negative control. The  
180 results of huATCase mutants are consistent with the *E. coli* mutants except for a very  
181 small difference that a single mutation (G132A) can completely abolish activity (Fig

182 2C and F).

183

184 To further confirm the importance of the flexibility of R167/130's loop, we "locked"  
185 ecATCase and ecATCase-holo at R state by using the C47A/A241C mutants of  
186 ecATCase and ecATCase-holo as previously reported (Mendes & Kantrowitz, 2010a,  
187 Mendes & Kantrowitz, 2010b, West, Tsuruta et al., 2002). The enzymatic activity  
188 result is almost the same; G166P and G128A/G130A mutants lost almost all activity  
189 (Fig EV1). Taken together, we conclude that the flexibility of R167/130's loop is  
190 important for ATCase's catalytic function, including that at the R state.

191 **The flexibility of R167/130's loop has a close relationship with  $K_m$  value of**  
192 **ATCase**

193 Based on enzyme kinetics curves,  $V_{max}$ ,  $K_m$ , and  $n_H$  were calculated and listed for  
194 various ATCases in Table EV1, which shows a strong correlation between  $K_m$  and the  
195 flexibility of R167/130's loop. By analyzing the sequences and interactions of  
196 R167/130's loop, we found that huATCase possesses the most flexible R167/130's  
197 loop, owing to an additional glycine (G132) in 130's loop (Fig 1D) and fewer  
198 interactions of R167 (Fig EV2 and Appendix Table S2). In comparison,  
199 ecATCase-holo possesses the least flexible R167/130's loop, owing to more  
200 interactions of R167 and the additional interactions of 130's loop derived from the  
201 hydrogen bond network at the interface between active site and the regulatory subunit.

202 The difference in flexibility is reflected in  $K_m$  values of various ATCases: huATCase  
203 has the smallest  $K_m$  value while ecATCase-holo has the largest. For ecATCase-holo  
204 locked in R state,  $K_m$  value dramatically decreased, even smaller than ecATCase,  
205 which indicates a more flexible R167/130's loop. The  $K_m$  value did not change much  
206 after ecATCase was locked in R state, which is consistent with previous studies of  
207 ecATCase (Mendes & Kantrowitz, 2010a) and can be explained since ecATCase  
208 locked at R state cannot resemble a true R state ecATCase-holo due to the lack of  
209 regulatory subunits. Taken together, the flexibility of R167/130's loop can notably  
210 influence catalytic property of ATCase in both human and *E. coli* enzymes, and  
211 ATCase with a more flexible R167/130's loop, would be more sensitive to the change  
212 of substrate concentration and easier to achieve full catalytic activity.

213 **ATCase mutants with a rigid R167/130's loop restrict R167 at either "out" or "in"**  
214 **state**

215 To further study the flexibility of R167/130's loop, we managed to solve the structures  
216 of G166P and G128A/G130A mutants of ecATCase and ecATCase-holo. Data  
217 collection and refinement statistics are shown in Table EV2. Corresponding mutations  
218 were confirmed in the electron density maps (Fig 1C). As shown in Fig 1C, R167 of  
219 G166P ecATCase and ecATCase-holo is restricted at "out" and "in" state, respectively.  
220 The situation is similar in the case of G128A/G130A ecATCase and ecATCase-holo.  
221 Given the fact that all these ATCase variants lost their activity almost completely, we

222 conclude that neither R167 “in” nor R167 “out” state alone is sufficient for the  
223 catalytic function of ATCase and R167 needs to be able to switch between “in” and  
224 “out” state in the catalytic cycle. Additionally, due to the close proximity and multiple  
225 interactions between R167 and 130’s loop (Fig EV2), R167’s flexibility is largely  
226 restricted if 130’s loop is rigid, which explains why the flexibility of 130’s loop is  
227 important and necessary.

228 **ATCase mutants with rigid R167/130’s loop can bind CP but cannot further bind**

229 **Asp**

230 To further assess the significance of R167’s conformation switch between “in” and  
231 “out” state during ATCase catalytic process, we did ITC experiments using wild-type,  
232 R167A, G166P, and G128A/G130A mutants of the ecATCase, in which wild-type and  
233 R167A mutant were the positive and negative control, respectively. We tested the  
234 binding of the ATCase enzymes with the natural substrates, CP and Asp. Our results  
235 show that all ATCase variants were able to bind CP, meaning that these mutations do  
236 not affect CP binding (Fig EV3, top). After CP binding, we titrated Asp in ATCase.  
237 For wild-type ecATCase, the reaction heat was so large, indicating enzymatic reaction,  
238 and the binding heat was masked completely (Fig EV3A, bottom). For ATCase  
239 mutants, only very small heat peaks appeared (Fig EV3B-D, bottom), indicating no  
240 enzymatic reaction occurred, which is consistent with the results of enzymatic kinetics  
241 assays. In the meanwhile, heat peaks in each assay are of almost the same height,

242 indicating no Asp binding occurred. We also performed ITC assays using  
243 ecATCase-holo and the results are the same with ecATCase (Fig EV4). All calculated  
244 ITC parameters are listed in Appendix Table S3. Because the mutants of ecATCase  
245 and ecATCase-holo have been shown to be either “locked” at R167 “in” or “out” state,  
246 it is clear that the flexibility afforded by R167/130’s loop is essential in helping Asp  
247 enter the active site to enable catalytic function.

#### 248 **Molecular dynamics simulation of R167 switch from “in” to “out” state of** 249 **ATCase**

250 Next, we performed a molecular dynamic simulation, in which one catalytic chain  
251 was chosen for each energy calculation and MD simulation. First, we calculated the  
252 total energy of R167 “in” and “out” state of huATCase (PDB ID: 5G1N and 5G1O),  
253 ecATCase (PDB ID: 1EKX and 3CSU), and ecATCase-holo (PDB ID: 4KGV and the  
254 wild-type apo-ecATCase-holo structure solved in this paper), in which PALA binding  
255 form ATCase were used for R167 “in” state and apo form ATCase were used for R167  
256 “out” state. It was found that the energy difference between the two states in  
257 huATCase is smaller than ecATCase or ecATCase-holo (Fig EV5), which suggests  
258 that R167 may be easier to switch in huATCase. This is consistent with our analysis  
259 demonstrating that huATCase possesses more flexible R167/130’s loop. We also  
260 calculated the energy of apo-ecATCase-holo (PDB ID: 4FYW) with R167 “in” state,  
261 and found it is close to and even higher than the energy of ecATCase-holo with R167

262 “out” state, indicating this structure may be an easier one to observe R167 switch in  
263 ecATCase-holo.

264

265 For MD simulation, the PALA bound structures (PDB ID: 5G1N, 1EKX, and 4KGV)  
266 with R167 “in” state were used firstly and PALA was removed in each model, which  
267 would facilitate “in” to “out” transition switch. For huATCase, after 20 ns simulation,  
268 R167 was able to switch from “in” to “out” state. During this simulation, huATCase  
269 domain opening took place, followed by gradual change of R167 from “in” to “out”  
270 state accompanied by the conformational change of 130’s loop (Movie EV1). The  
271 final conformation of 130’s loop was highly consistent with that in apo-huATCase  
272 (PDB ID: 5G1O). However, for ecATCase and ecATCase-holo, we did not observe  
273 this switch after 100 ns, which is consistent with the energy analysis above. We thus  
274 further performed the same simulation using apo-ecATCase-holo with R167 “in” state  
275 (PDB ID: 4FYW) and observed R167 switch after 40 ns (Movie EV2). The start and  
276 end models in simulations where R167 switch occurred were aligned and are shown  
277 in Fig 3A and B. The heat maps depicting the cross-correlation of the C $\alpha$  of residues  
278 are shown in Fig EV5B.

279 **The R167/130’s loop region is closely related to the feedback regulation of**  
280 **ATCase**

281 We carried out a fluorescent assay to further demonstrate that ATCase possessing a

282 rigid region of R167/130's loop is not able to transit from T to R state. ecATCase-holo  
283 was used in this experiment and results are shown in Appendix Fig S2. Consistent  
284 with our ITC results, only wild-type ecATCase-holo was able to undergo T to R  
285 transition, whereas G166P and G128A/G130A mutants could not, akin to R167A  
286 mutant (Appendix Fig S2B). This result reveals that this region likely controls the  
287 difficulty level for ATCase to transit from T to R state, which is also regulated by the  
288 binding of different nucleotides in the feedback regulation. In light of the fact that this  
289 R167/130's loop region locates at the interface between active site and regulatory  
290 subunit, we consider that it may serve as a previously unknown feedback regulatory  
291 feature in ecATCase-holo function.

292

293 To verify our speculation, we performed MD simulation using ecATCase-holo (one  
294 catalytic chain and one regulatory chain were used) to detect the structural difference  
295 around the R167/130's loop region as a result of pyrimidines or purines binding. A  
296 previous structure (PDB ID: 4FYY) (Cockrell & Kantrowitz, 2012) was chosen for  
297 the pyrimidines binding model of T state ecATCase-holo; and purines binding model  
298 was obtained by replacing the pyrimidines by purines in the same structure. The  
299 pyrimidines and purines binding models of R state ecATCase-holo were also  
300 established based on the relevant structures (PDB ID: 4KH1 and 4KH0) (Cockrell et  
301 al., 2013). After 20 ns simulation, we found that for T state ATCase ecATCase-holo,  
302 the binding free energy of pyrimidines or purines binding model between catalytic

303 and regulatory subunit displayed a significant difference. Comparing with pyrimidines  
304 binding model, purines binding caused a higher binding free energy, indicating a less  
305 stable combination between catalytic and regulatory subunit, and the hydrogen bond  
306 network associated with the region of R167/130's loop was also partially destroyed,  
307 which was not found in R state ecATCase-holo (Appendix Fig S3). Taken together,  
308 these results suggest a close relationship between the region of R167/130's loop and  
309 the feedback regulation.

### 310 **Virtual compound screening yields two inhibitors targeting apo-huATCase**

311 Since huATCase is a known cancer drug target, we wondered whether the newly  
312 found R167/130's loop region of ATCase could be targeted, in conjunction with the  
313 active site, to develop new dual-targeting inhibitors for ATCase. To this end, we  
314 performed a virtual compound screening simultaneously targeting both the active site  
315 and the newly found regulatory region of apo-huATCase. After two rounds of  
316 screening, 27 high-ranking compounds were selected and purchased in a small  
317 amount. We then performed 5 rounds of preliminary inhibition experiments for  
318 huATCase and selected 5 compounds (YD9, YD11, YD19, YD20, and YD21) which  
319 showed strong and consistent inhibition on the activity of ATCase. Further  
320 experiments helped us determine 2 decisions (YD19 and YD21) finally. The whole  
321 computer-aided screening workflow is shown in Fig 4A.

322



323 After the 5 candidates were determined, we purchased a large quantity of these 5  
324 compounds and carried out quantitative inhibition experiments. YD9 and YD11 were  
325 quickly abandoned due to their poor solubility, and YD19, YD20, and YD21 were  
326 used for the experiments. As shown in Fig 4B, YD19 and YD21 stood out with  $IC_{50}$  of  
327  $4.1 \pm 1.9 \mu\text{M}$  and  $15.4 \pm 1.6 \mu\text{M}$ , respectively. We also tested the  $IC_{50}$  of these two  
328 compounds for ecATCase, which were  $1.8 \pm 0.4 \mu\text{M}$  and  $5.0 \pm 1.4 \mu\text{M}$ . YD20 and  
329 Fluorouracil (5FU) had no significant inhibition (Fig 4C); 5FU is a known cancer  
330 drug and will be used as the positive control in our MTT cell toxicity assays. ITC  
331 assays detecting the binding of these four compound with ATCase also produced  
332 consistent results, in which YD19 and YD21 showed binding to ecATCase and  
333 huATCase, whereas YD20 and 5FU did not (Appendix Fig S4). Calculated ITC  
334 parameters are listed in Appendix Table S3.

### 335 **Docking YD19 and YD21 to huATCase**

336 After identifying YD19 and YD21 as top candidate inhibitors, we performed a more  
337 vigorous docking study. The two compounds can adopt 4 configurations due to  
338 tautomerism and cis-trans isomerism in YD19 and optical isomerism in YD21  
339 (Appendix Fig S5A and C), respectively. Thus, we performed docking for all 4  
340 configurations of each compound, followed by molecular simulation which was  
341 heated and equilibrated for 50 ns. According to the binding free energy analysis  
342 (Appendix Fig S5B and D), the best binding model of each compound and

343 corresponding interactions are shown in Fig 3C and D. YD19 interacts with D129,  
344 R167 and T168 and YD21 interact with T55, H134 and T168. YD19 appears better  
345 than YD21 because it rigidifies the R167/130's loop region by interacting with it and  
346 its binding is also more stable, according to the binding free energy results.

347 **YD19 and YD21 inhibit the proliferation of several cancer cell lines in MTT**  
348 **assay**

349 To evaluate the anticancer potential, we performed cytotoxicity studies of the two  
350 compounds using six cell lines, including five cancer cell lines (A549, HeLa, MCF7,  
351 HepG2, PC3) and one normal somatic cell line (CCC) using MTT assay, with 5FU as  
352 a positive control. As shown in Fig 5A, the cytotoxicity of the compounds varies in  
353 different cell lines. YD19 has good inhibitory effect on HeLa, MCF7, HepG2, and PC3,  
354 whereas YD21 has an appreciable inhibitory effect on all six cell lines. In general, for  
355 cancer cell lines YD19 and YD21 are better than the clinically used anticancer drug  
356 5FU, while YD19 is a slightly better than YD21 except for A549 cells; for normal cell  
357 lines (CCC), YD19 has the least toxicity. Therefore, YD19 seems a better molecule  
358 among the two candidate compounds and control. For comparison, YD20 was also  
359 tested at a single concentration but it could not effectively inhibit all six cell lines  
360 (Appendix Fig S6), which is consistent with its poor inhibition of ATCase catalytic  
361 activity.

## 362 **YD19 and YD21 inhibit tumor growth in xenograft assays**

363 BALB/c (nu/nu) mice with xenograft Hela tumor in the flanks were randomized into  
364 four groups and treated with DMSO, YD19, YD21, and 5FU respectively via i.t.  
365 injection every 2 days for a month. As shown in Fig 5B, YD19 and YD21 both  
366 inhibited the growth of xenograft tumors similar to 5FU; YD19 was more effective  
367 than YD21. The weights of mice were not affected by these compounds, which may  
368 be explained by the i.t. injection method we used. The final tumor volume in YD19  
369 group was notably smaller than the DMSO group, and a similar situation occurred in  
370 5FU group but not in YD21 group (Fig 5C). Hematoxylin and eosin staining of tumor  
371 sections showed extensive death of cancer cells in YD19, YD21, and 5FU groups.  
372 Cancer cells only occupied a small part of the whole tumor tissue and were restricted  
373 focally, indicating very weak diffusion. In contrast, in the negative control DMSO  
374 group, cancer cells occupied a larger portion of the entire tumor tissue and showed a  
375 dispersive distribution, indicating relative strong diffusion (Fig 5D). These results  
376 demonstrate that the two compounds are promising in not only impeding the growth  
377 and proliferation of multiple cancer cell lines *in vitro* but also inhibiting tumor growth  
378 *in vivo*.

## 379 **Discussion**

380 In this work, motivated by our newly discovered feedback regulatory mechanism, we  
381 have successfully identified inhibitory compounds using a dual-targeting strategy. The

382 lead compounds have demonstrated promise in enzymatic assay, in vitro, and in vivo.

383 A model depicts the whole work is shown in Fig 6.

384

385 During the study on ATCase, we firstly solved a wild-type apo-ecATCase-holo with

386 R167 “out” state (Fig 1A), which has helped uncover a previously neglected

387 regulatory region of ATCase including R167 and 130’s loop. Through mutagenesis,

388 we were able to reduce the conformational flexibility of R167/130’s loop and

389 facilitate “out” state in ecATCase and “in” state in ecATCase-holo respectively (Fig

390 1C). Using both *E. coli* and human ATCase mutants as a probe, we revealed that

391 neither R167 “in” nor “out” state alone is adequate to enable ATCase catalytic

392 function as evidenced by our enzymatic assay and ITC assay results. During ATCase

393 catalytic cycle, R167 needs to switch between “in” and “out” states, modulated by

394 130’s loop, which help Asp enter the active site of ATCase and very likely to help the

395 release of product CA, too. 130’s loop is further modulated by regulatory subunit in

396 the case of ecATCase-holo. Therefore, the flexibility of R167/130’s loop region plays

397 a key regulatory role in the catalytic process of ATCase.

398

399 Our finding that there is a correlation between  $K_m$  value and flexibility of R167/130’s

400 loop is very intriguing.  $K_m$  value is smaller for ATCase with more flexible region of

401 R167/130’s loop, indicating it is more sensitive to the change of substrate

402 concentration and easier to achieve full catalytic activity. MD simulating R167 switch

403 from “in” to “out” state also shows consistent results. Another factor can notably  
404 influence the  $K_m$  value is the type of nucleotides, in which  $K_m$  value increases with  
405 pyrimidines bound and decreases with purines bound. Considering that the  
406 R167/130’s loop region is located between the active site and the regulatory subunit,  
407 we explored this region by MD simulation and found that there is a close relationship  
408 between the region and the feedback regulation. This conclusion is also supported by  
409 previous literature that mutating residues involved in the hydrogen bond network  
410 either destabilizes T state to promote R state of ecATCase-holo (K143rA mutant)  
411 (Eisenstein, Markby et al., 1990), or even abolishes the feedback effect of pyrimidines  
412 or purines (N111rA, N113rA and E142rA mutants) (Eisenstein et al., 1989).

413

414 Based on the findings mentioned above, we hypothesized the R167/130’s loop region  
415 as a previously unappreciated regulatory element in response to the binding of  
416 pyrimidines or purines, in which the binding of pyrimidines in regulatory subunit  
417 rigidifies this region while binding of purines relaxes it. Such changes in the region  
418 would further make T to R transition easier or more difficult, which represents the  
419 mechanism of the feedback regulation (Fig 6, top). In addition, we found the results of  
420 huATCase were very similar to ecATCase as evidenced by enzymatic assays and MD  
421 simulations; it is known that CAD is also regulated by cooperativity effect and  
422 feedback regulation (Moreno-Morcillo et al., 2017, Serre et al., 2004). Therefore, we  
423 inferred this mechanism in CAD, which laid foundation for us to design new

424 inhibitors targeting apo-huATCase that would not cause domain closure as causing the  
425 failure of PALA. Building on the discovery of the new feedback regulation  
426 mechanism, we have successfully identified two inhibitors targeting both the newly  
427 found regulatory region and the active site of apo-huATCase (Fig 6, bottom). The  
428 compound position and extensive contacts with the R167/130's loop region would  
429 make it almost impossible for R167 to switch from "out" to "in" state and interact  
430 with E50. Thus, after binding with these two inhibitors, domain closure of huATCase  
431 would not occur. The  $IC_{50}$  of the two compounds is micro-molarity (Fig 4B), which  
432 are significantly better than the existing inhibitors of apo-ecATCase (Heng, Stieglitz  
433 et al., 2006) (with a best  $IC_{50}$  of 79  $\mu$ M, about 40-fold less potent than the best result  
434 we obtained). It is noted that owing to the relatively poor solubility and multiple  
435 configurations of the two compounds, the real inhibiting capacity of them may have  
436 been considerably stronger.

437

438 The two inhibitors derived from our dual-action strategy, which simultaneously target  
439 both the active site and the new feedback regulatory site of R167/130's loop, represent  
440 a novel avenue to design anticancer drugs towards huATCase. Those initial  
441 compounds without any structural modification yet have already shown great promise  
442 as shown by our results of MTT and xenograft assays. They inhibit the proliferation of  
443 multiple cancer cell lines *in vitro*, as well as the growth of mice xenograft tumors *in*  
444 *vivo* (Fig 5). MD simulation and binding free energy analysis have helped us identify

445 the best binding mode of each compound, which makes it possible to analyze the  
446 interactions. These results will certainly help guide chemical modifications of the  
447 compounds. Between the two lead compounds, YD19 is a better inhibitor and has  
448 better fit in the ATCase structure, thus representing a good starting point for structure  
449 modification. For clarity, we divide YD19 into three parts (Appendix Fig S7), in  
450 which part I occupies the active site region, part II occupies the newly found  
451 regulatory region and part III occupies the remaining region of the pocket. For part I,  
452 we would like to increase electronegativity to strengthen its interaction with the  
453 positive active site. While modification of part II can be minor, major modification  
454 can be applied in part III because the chlorophenyl moiety seems to be somewhat  
455 redundant. Other smaller substituent groups should be tested. Design and synthesis of  
456 new compounds are on the way.

## 457 **Materials and Methods**

### 458 **Cloning, expression, and purification of ecATCase, ecATCase-holo, huATCase,** 459 **and corresponding mutants**

460 The cDNA of wild-type ecATCase and regulatory chain of ecATCase-holo were  
461 amplified by PCR (Qiagen Kit) using BL21(DE3) strain genome as template, and  
462 were inserted into pET28b and pET22b, respectively. The cDNA of wild-type  
463 huATCase was obtained as a gift from Han lab in Xiamen University, and was  
464 inserted into pOPINM (addGene) as reported by Ruiz-Ramos *et al.* (Ruiz-Ramos,

465 Lallous et al., 2013). Site-directed mutation kit (Qiagen) was used to obtain plasmids  
466 with mutations using corresponding wild-type plasmids as templates. BL21(DE3)  
467 strain was chosen for expressing ecATCase and ecATCase-holo, and  
468 BL21(DE3)pLysS was used for expressing huATCase. Transformants were cultured in  
469 1 L TB medium at 310 K and induced by 0.5 mM IPTG when  $OD_{600} \approx 1.0$ , followed by  
470 overnight culturing at 289 K. Bacteria pellet was collected by centrifuging and  
471 resuspended in Buffer A (50 mM Tris-HCl pH 8.0, 300 mM NaCl and 10% Glycerol)  
472 for lysis by sonication. The lysate was then centrifuged at 15 000  $\times g$  and the  
473 supernatant was added to the 1 mL Ni-NTA resin (Qiagen). After washing with Buffer  
474 A supplied with 30 mM imidazole, protein was eluted with 15 mL Buffer A supplied  
475 with 300 mM imidazole. The eluted protein was then buffer exchanged into Buffer B  
476 (50 mM Tris-acetate pH 8.3) for enzymatic activity and ITC assays, or Buffer C (50  
477 mM Tris-acetate pH 8.3, 2 mM DTT and 5% Glycerol) for subsequent purification by  
478 HiLoad Superdex 200 column (GE). Protein in peak fractions was collected for  
479 crystallization assays.

#### 480 **Crystallization and structure determination of ecATCase and ecATCase-holo**

481 The preliminary crystallization condition was screened by the sparse matrix method  
482 and hanging drop vapor diffusion method was then used to improve the quality of  
483 preliminary crystal hits. The final optimal crystallization condition was 0.2 M  $NH_4Ac$ ,  
484 0.1 M Tris pH 8.5, 20% PEG3350, and 10% glycerol for ecATCase, and 0.1 M



485 HEPES pH 7.0, 30% Jeffamine M-600 pH 7.0, and 10% glycerol for ecATCase-holo.  
486 Crystals appeared in two days and grew to full size within ten days. X-ray diffraction  
487 data were collected using BL17U1 Beamline of Shanghai Synchrotron Radiation  
488 Facility (Wang, Zhang et al., 2018) at 0.979 Å or Rigaku X-ray generator at 1.542 Å.  
489 Datasets were processed by HKL-2000 (Otwinowski & Minor, 1997) and molecular  
490 replacement was performed by using a previous T state ecATCase-holo structure  
491 (PDB ID: 1ZA1) (Wang, Stieglitz et al., 2005) as searching template. Refinements  
492 were carried out by phenix.refine within Phenix (Adams, Afonine et al., 2010) and  
493 refmac5 within CCP4 suite (Collaborative Computational Project, 1994), as well as  
494 Coot (Emsley & Cowtan, 2004) for manual adjustments.

#### 495 **Enzymatic activity assay of ATCase**

496 Enzymatic activity assay was performed colorimetrically as previously reported  
497 (Pastra-Landis, Foote et al., 1981) and protein concentration was adjusted to make the  
498 final readout fall into rational range, which is 6 nM for ecATCase and ecATCase-holo,  
499 and 600 nM for huATCase. Final readout was determined by a microplate reader  
500 (Thermo) in 96-well plates and data were transformed into product concentration  
501 according to the standard curve, derived from the same approach using  
502 N-carbamoyl-DL-aspartate (TCI) as a standard reaction product (Appendix Fig S8).  
503 Datasets were fitted with the Michaelis-Menten equation with/without substrate  
504 inhibition modification or the Hill equation with/without substrate inhibition

505 modification as previously reported (Pastra-Landis, Evans et al., 1978), according to  
506 different situations. To calculate  $V_{max}$ ,  $K_m$ , and  $n_H$ , data at high concentration of  
507 substrate were truncated to eliminate the effect of substrate inhibition and fitted with  
508 Michaelis-Menten or Hill equation. Parameters and corresponding standard errors  
509 were calculated from these equations by OriginPro 2018 (Table EV1) and figures  
510 were plotted by GraphPad Prism 7.00. The concentration of different protein samples  
511 was measured by NonoPhotometer P-Class (IMPLEN) using their corresponding  
512 molar extinction coefficient ( $\epsilon$ ), in which the  $\epsilon$  of ecATCase and ecATCase-holo were  
513 previously reported (Gerhart & Holoubek, 1967) and the  $\epsilon$  of huATCase was  
514 calculated using ExPASy.

### 515 **Isothermal titration calorimetry**

516 ITC assays for substrates binding were performed as follows. First, protein, Asp and  
517 CP were diluted to 50  $\mu$ M, 500  $\mu$ M, and 500  $\mu$ M with Buffer B, respectively. For each  
518 variant of ecATCase and ecATCase-holo, three assays were done: 50  $\mu$ M protein was  
519 titrated by 500  $\mu$ M CP; 50  $\mu$ M protein was titrated by 500  $\mu$ M Asp; and 50  $\mu$ M  
520 protein mixed with 4.8 mM CP was titrated by 500  $\mu$ M Asp mixed with 4.8 mM CP.  
521 Data were processed by OriginPro 2018 to obtain parameters depicting the binding  
522 between substrates and ecATCase or ecATCase-holo.

523

524 ITC assays for inhibitors binding were performed as follows. First, different

525 compounds (YD19, YD20, YD21, and 5FU) dissolved in DMSO were diluted to 500  
526  $\mu\text{M}$  with Buffer B, and final DMSO percentage was accurately controlled at 5%. Next,  
527 ecATCase and huATCase were diluted to 50  $\mu\text{M}$  with Buffer B, in which process, 5%  
528 DMSO was added to ensure consistency with inhibitors. For both ecATCase and  
529 huATCase, four assays were performed that protein was titrated by YD19, YD20,  
530 YD21, and 5FU, respectively. Data were also processed by OriginPro 2018.

### 531 **Fluorescence assay**

532 Fluorescence assays were performed as previously reported (Fetler, Tauc et al., 2001)  
533 with some modifications. Firstly, the two intrinsic tryptophan residues of  
534 ecATCase-holo were mutated to nonfluorescent phenylalanines. Next, rF145 (r  
535 indicates a residue in the regulatory chain of ecATCase-holo) was mutated to  
536 tryptophan to enable fluorescence signal during T to R transition. Enzymatic activity  
537 of G166P and G128A/G130A mutants based on W209F/W284F/rF145W were also  
538 tested to confirm consistency with preceding results (Appendix Fig S2A).

539

540 To detect fluorescence change during the T to R state transition of ecATCase-holo,  
541 following steps were performed. Protein (saturated with 4.8 mM CP) was loaded in a  
542 fluorescent cuvette and the excitation/emission wavelength was optimized. The final  
543 optimized wavelengths were 273 nm for excitation and 324 nm for emission, which  
544 were used for all time-course fluorescent assays. During these assays, the sample

545 containing protein and CP was excited at 273 nm and the emission at 324 nm was  
546 continuously recorded for ~20 s before a rapid injection of 30 mM Asp (final  
547 concentration), followed by a record for another ~40 s. Final fluorescence signal  
548 change was obtained by substrating the signal in the blank control group from the  
549 sample groups.

### 550 **Virtual inhibitor screening**

551 We performed virtual compound screening, targeting apo-huATCase, using AutoDock  
552 Vina (Trott & Olson, 2010) and AutoDockTools4 (Morris, Huey et al., 2009). A  
553 library containing ~110,000 compounds (Pharmacodia Inc. Beijing) was obtained and  
554 those with the molecular weight (MW) greater than 1,000 were omitted. Search space  
555 was set at  $30 \text{ \AA} \times 30 \text{ \AA} \times 30 \text{ \AA}$ , covering both the active site region and the newly  
556 identified R167/130's loop region. Two rounds of screening were performed as  
557 follows. In the first round, no residue side chain of the receptor was treated as flexible  
558 during docking. Screening result was sorted by the docking score and the top 1,000  
559 were selected for the second round. In the second round, residue side chains of  
560 receptor close to the docking compounds were treated as flexible and screening result  
561 was sorted by score. Next, compounds appearing in both the top 100 of the two  
562 rounds were compared and redundant structures were abandoned. Finally, the  
563 remaining compounds were purchased in a small amount for the inhibition assays.

## 564 **Enzymatic activity inhibiting assay of ATCase**

565 For inhibition assays, substrate concentration at the  $V_{\max}$  of the corresponding  
566 enzymatic kinetics curve was chosen, which is 30 mM Asp for ecATCase and 3 mM  
567 Asp for huATCase. Procedures are similar to the enzymatic activity assay except that  
568 different compounds were added before initiating the reaction with 4.8 mM CP.  
569 Experiment with the same percentage of DMSO was used as a control and all  
570 experiments also had a blank control without Asp to eliminate the additional  
571 absorption caused by different compounds.

572

573 For  $IC_{50}$  determination, compounds with relatively large quantity were needed and  
574 purchased (ChemDiv, California). For each compound, we carried out at least eight  
575 experiments using different concentrations in consecutive double dilution. Logarithms  
576 of compound concentrations were used as X value and datasets were fitted with  
577 dose-response equation. Corresponding  $IC_{50}$ , as well as standard error, were  
578 calculated from the fitted equations by OriginPro 2018 and figures were plotted by  
579 GraphPad Prism 7.00.

## 580 **Molecular dynamics simulations**

581 All MD simulations and post processes were performed using programs in Amber16  
582 or AmberTools16 (Case, Betz et al., 2016). The same simulation protocol was used as  
583 follows. Firstly, tleap was used to generate the topology and coordinate files for each

584 system, during which ff14SB force field parameters were used for protein, while  
585 parameters for small compounds were generated by antechamber and parmchk. Each  
586 system was neutralized by Na<sup>+</sup> or Cl<sup>-</sup> ions and was explicitly solvated by using the  
587 TIP3P water potential inside a box of water molecules with a minimum solute-wall  
588 distance of 10 Å, except for total energy calculation of a system, for which implicit  
589 solvated model was used instead of an explicit one. Next, pmemd was used to perform  
590 six cycles of minimizations to remove unfavorable contacts of each system, during  
591 which Cartesian restraints (decreasing from 0.1 kcal/mol/Å<sup>2</sup> to 0) was applied to  
592 protein. The energy-minimized system was then heated over 200 ps from 0 to 310 K  
593 without restraints, during which constant volume was maintained. Finally, 2 ns  
594 unrestrained equilibration was carried out under constant pressure (1 bar) and  
595 temperature (310 K), followed by a 20-100 ns unrestrained molecular dynamics  
596 simulation. For post processes, Cpptraj was used to generate dynamic  
597 cross-correlation matrix and convert each frame of MD simulation into PDB format.  
598 MMPBSA.py was used to perform the binding free energy analysis, as well as the  
599 energy decomposition analysis.

#### 600 **MTT cytotoxicity assay**

601 All cell lines used in this research were obtained from the Cell Resource Center  
602 (Peking Union Medical College Headquarters of National Infrastructure of Cell Line  
603 Resource, NSTT). MTT assays were performed as follows. First, different types of

604 cells were seeded into 96-well plates (1,000 cells/well) and cultured for 24 h. After  
605 adding compound, cells were continuously cultured for 3 d. Next, MTT solution was  
606 added and incubated in the dark for 4 h followed by careful removal of medium and  
607 addition of 150  $\mu$ L DMSO. After shaking on a microplate reader for 10 min to  
608 adequately dissolve the Formazan reduced from MTT, readings at A570 nm was  
609 recorded and IC<sub>50</sub> was calculated the same as referred above.

### 610 **Xenograft mouse model**

611 The female BALB/c (nu/nu) mice were purchased from Vital River Laboratories  
612 (Beijing, China). All animal experiments were performed in accordance with the  
613 Guide for the Care and Used of Laboratory Animals and were approved by the  
614 Experimental Animal Ethics Committee in Beijing. For xenograft mouse assay,  $5 \times$   
615  $10^6$  Hela cells were injected subcutaneously in the flanks of 20 four- to six-week-old  
616 female BALB/c (nu/nu) mice. After most of the tumor volumes exceeded 100 mm<sup>3</sup>,  
617 12 mice with similar tumor volume were selected and randomly divided into four  
618 groups (3/group) with the treatment of 2.5 mg/kg DMSO (a negative control), YD19,  
619 YD21, and 5FU (a known cancer drug as a positive control) respectively via i.t.  
620 injection once every 2 days, lasting for one month. Tumor volume and body weight  
621 were measured every 2 days before injection. After 15 treatments, mice were  
622 euthanized, and the tumors were harvested, photographed, spliced, and stained by  
623 hematoxylin and eosin. The stained tumor splices were photographed and analyzed

624 under a microscope with a camera.

## 625 **Acknowledgments:**

626 We thank Han lab in Xiamen University for the generous gift of CAD cDNA and staff  
627 at BL17U1 beamline of Shanghai synchrotron facility for their help in diffraction data  
628 collection. **Funding:** This work was supported by grants from the National Natural  
629 Science Foundation of China (No. 21773014), as well as, Natural Sciences and  
630 Engineering Research Council of Canada (No. RGPIN-2018-04427).

## 631 **Author contributions**

632 Lei, Z. performed the main experiments and molecular dynamic simulations. Wang, N.  
633 contributed to X-ray data collection and structure determination. Wang, B. helped in  
634 mouse experiments. Lu, Z. helped in protein preparation. Tan, H. helped in dynamic  
635 simulations. Lei, Z., Wang, N., Zheng, J., and Jia, Z. designed the project and wrote  
636 the article. All authors reviewed and approved this article.

## 637 **Conflict of interest**

638 The authors declare that they have no conflict of interest.

## 639 **References**

640 Adams PD, Afonine PV, Bunkoczi G, Chen VB, Davis IW, Echols N, Headd JJ, Hung



641 LW, Kapral GJ, Grosse-Kunstleve RW, McCoy AJ, Moriarty NW, Oeffner R, Read RJ,  
642 Richardson DC, Richardson JS, Terwilliger TC, Zwart PH (2010) PHENIX: a  
643 comprehensive Python-based system for macromolecular structure solution. *Acta*  
644 *crystallographica Section D, Biological crystallography* 66: 213-21  
645 Aoki T, Weber G (1981) Carbamoyl phosphate synthetase (glutamine-hydrolyzing):  
646 Increased activity in cancer cells. *Science (New York, NY)* 212: 463-464  
647 Case D, Betz R, Cerutti DS, Cheatham T, Darden T, Duke R, Giese TJ, Gohlke H,  
648 Götz A, Homeyer N, Izadi S, Janowski P, Kaus J, Kovalenko A, Lee T-S, LeGrand S,  
649 Li P, Lin C, Luchko T, Kollman PA (2016) Amber 2016, University of California, San  
650 Francisco.  
651 Cockrell GM, Kantrowitz ER (2012) Metal ion involvement in the allosteric  
652 mechanism of *Escherichia coli* aspartate transcarbamoylase. *Biochemistry* 51:  
653 7128-37  
654 Cockrell GM, Zheng Y, Guo W, Peterson AW, Truong JK, Kantrowitz ER (2013) New  
655 paradigm for allosteric regulation of *Escherichia coli* aspartate transcarbamoylase.  
656 *Biochemistry* 52: 8036-8047  
657 Collaborative Computational Project N (1994) The CCP4 suite: programs for protein  
658 crystallography. *Acta crystallographica Section D, Biological crystallography* 50:  
659 760-3  
660 Eisenstein E, Markby DW, Schachman HK (1989) Changes in stability and allosteric  
661 properties of aspartate transcarbamoylase resulting from amino acid substitutions in

662 the zinc-binding domain of the regulatory chains. Proceedings of the National  
663 Academy of Sciences of the United States of America 86: 3094-8

664 Eisenstein E, Markby DW, Schachman HK (1990) Heterotropic effectors promote a  
665 global conformational change in aspartate transcarbamoylase. Biochemistry 29:  
666 3724-31

667 Emsley P, Cowtan K (2004) Coot: model-building tools for molecular graphics. Acta  
668 crystallographica Section D, Biological crystallography 60: 2126-32

669 Evans DR, Guy HI (2004) Mammalian pyrimidine biosynthesis: fresh insights into an  
670 ancient pathway. The Journal of biological chemistry 279: 33035-8

671 Fetler L, Tauc P, Herve G, Cunin R, Brochon JC (2001) Tryptophan residues at  
672 subunit interfaces used as fluorescence probes to investigate homotropic and  
673 heterotropic regulation of aspartate transcarbamylase. Biochemistry 40: 8773-82

674 Gerhart JC, Holoubek H (1967) The purification of aspartate transcarbamylase of  
675 Escherichia coli and separation of its protein subunits. The Journal of biological  
676 chemistry 242: 2886-92

677 Gerhart JC, Pardee AB (1962) The enzymology of control by feedback inhibition. The  
678 Journal of biological chemistry 237: 891-6

679 Gouaux JE, Lipscomb WN (1990) Crystal structures of phosphonoacetamide ligated T  
680 and phosphonoacetamide and malonate ligated R states of aspartate  
681 carbamoyltransferase at 2.8-Å resolution and neutral pH. Biochemistry 29:  
682 389-402

683 Gouaux JE, Stevens RC, Lipscomb WN (1990) Crystal structures of aspartate  
684 carbamoyltransferase ligated with phosphonoacetamide, malonate, and CTP or ATP at  
685 2.8-Å resolution and neutral pH. *Biochemistry* 29: 7702-7715

686 Grem JL, King SA, O'Dwyer PJ, Leyland-Jones B (1988) Biochemistry and clinical  
687 activity of N-(phosphonacetyl)-L-aspartate: a review. *Cancer research* 48: 4441-4454

688 Guo W, West JM, Dutton AS, Tsuruta H, Kantrowitz ER (2012) Trapping and  
689 structure determination of an intermediate in the allosteric transition of aspartate  
690 transcarbamoylase. *Proceedings of the National Academy of Sciences of the United  
691 States of America* 109: 7741-6

692 Ha Y, Allewell NM (1998) Intersubunit hydrogen bond acts as a global molecular  
693 switch in *Escherichia coli* aspartate transcarbamoylase. *Proteins* 33: 430-43

694 Heng S, Stieglitz KA, Eldo J, Xia J, Cardia JP, Kantrowitz ER (2006) T-state  
695 inhibitors of *E. coli* aspartate transcarbamoylase that prevent the allosteric transition.  
696 *Biochemistry* 45: 10062-71

697 Howlett GJ, Schachman HK (1977) Allosteric regulation of aspartate  
698 transcarbamoylase. Changes in the sedimentation coefficient promoted by the  
699 bisubstrate analog N-(phosphonacetyl)-L-aspartate. *Biochemistry* 16: 5077-5083

700 Huang J, Lipscomb WN (2004) Products in the T-state of aspartate transcarbamoylase:  
701 crystal structure of the phosphate and N-carbamyl-L-aspartate ligated enzyme.  
702 *Biochemistry* 43: 6422-6

703 Huang J, Lipscomb WN (2006) T-state active site of aspartate transcarbamoylase:

704 crystal structure of the carbamyl phosphate and L-alanosine ligated enzyme.  
705 *Biochemistry* 45: 346-52

706 Jones ME (1980) Pyrimidine nucleotide biosynthesis in animals: genes, enzymes, and  
707 regulation of UMP biosynthesis. *Annu Rev Biochem* 49: 253-79

708 Kantrowitz E, Lipscomb W (1988) *Escherichia coli* aspartate transcarbamylase: the  
709 relation between structure and function. *Science (New York, NY)* 241: 669-674

710 Kantrowitz ER (2012) Allostery and cooperativity in *Escherichia coli* aspartate  
711 transcarbamoylase. *Archives of biochemistry and biophysics* 519: 81-90

712 Ke HM, Lipscomb WN, Cho YJ, Honzatko RB (1988) Complex of  
713 N-phosphonacetyl-L-aspartate with aspartate carbamoyltransferase. X-ray refinement,  
714 analysis of conformational changes and catalytic and allosteric mechanisms. *Journal*  
715 *of molecular biology* 204: 725-47

716 Krause KL, Volz KW, Lipscomb WN (1987) 2.5 Å structure of aspartate  
717 carbamoyltransferase complexed with the bisubstrate analog  
718 N-(phosphonacetyl)-L-aspartate. *Journal of molecular biology* 193: 527-53

719 Ladjimi MM, Kantrowitz ER (1988) A possible model for the concerted allosteric  
720 transition in *Escherichia coli* aspartate transcarbamylase as deduced from site-directed  
721 mutagenesis studies. *Biochemistry* 27: 276-83

722 Lee L, Kelly RE, Pastra-Landis SC, Evans DR (1985) Oligomeric structure of the  
723 multifunctional protein CAD that initiates pyrimidine biosynthesis in mammalian  
724 cells. *Proceedings of the National Academy of Sciences* 82: 6802-6806

- 725 Lipscomb WN, Kantrowitz ER (2012) Structure and mechanisms of Escherichia coli  
726 aspartate transcarbamoylase. *Accounts of chemical research* 45: 444-53
- 727 Mendes KR, Kantrowitz ER (2010a) A cooperative Escherichia coli aspartate  
728 transcarbamoylase without regulatory subunits. *Biochemistry* 49: 7694-703
- 729 Mendes KR, Kantrowitz ER (2010b) The pathway of product release from the R state  
730 of aspartate transcarbamoylase. *Journal of molecular biology* 401: 940-8
- 731 Moreno-Morcillo M, Grande-Garcia A, Ruiz-Ramos A, Del Cano-Ochoa F, Boskovic  
732 J, Ramon-Maiques S (2017) Structural Insight into the Core of CAD, the  
733 Multifunctional Protein Leading De Novo Pyrimidine Biosynthesis. *Structure*  
734 (London, England : 1993) 25: 912-923 e5
- 735 Morris GM, Huey R, Lindstrom W, Sanner MF, Belew RK, Goodsell DS, Olson AJ  
736 (2009) AutoDock4 and AutoDockTools4: Automated docking with selective receptor  
737 flexibility. *J Comput Chem* 30: 2785-91
- 738 Newell JO, Schachman HK (1990) Amino acid substitutions which stabilize aspartate  
739 transcarbamoylase in the R state disrupt both homotropic and heterotropic effects.  
740 *Biophys Chem* 37: 183-96
- 741 Otwinowski Z, Minor W (1997) [20] Processing of X-ray diffraction data collected in  
742 oscillation mode. In *Methods in Enzymology*, pp 307-326. Academic Press
- 743 Pastra-Landis S, Foote J, Kantrowitz ER (1981) An improved colorimetric assay for  
744 aspartate and ornithine transcarbamylases. *Analytical biochemistry* 118: 358-363
- 745 Pastra-Landis SC, Evans DR, Lipscomb WN (1978) The effect of pH on the

746 cooperative behavior of aspartate transcarbamylase from *Escherichia coli*. *The Journal*  
747 *of biological chemistry* 253: 4624-30

748 Ruiz-Ramos A, Lallous N, Grande-Garcia A, Ramon-Maiques S (2013) Expression,  
749 purification, crystallization and preliminary X-ray diffraction analysis of the aspartate  
750 transcarbamoylase domain of human CAD. *Acta crystallographica Section F,*  
751 *Structural biology and crystallization communications* 69: 1425-30

752 Ruiz-Ramos A, Velazquez-Campoy A, Grande-Garcia A, Moreno-Morcillo M,  
753 Ramon-Maiques S (2016) Structure and Functional Characterization of Human  
754 Aspartate Transcarbamoylase, the Target of the Anti-tumoral Drug PALA. *Structure*  
755 (London, England : 1993) 24: 1081-94

756 Serre V, Penverne B, Souciet JL, Potier S, Guy H, Evans D, Vicart P, Herve G (2004)  
757 Integrated allosteric regulation in the *S. cerevisiae* carbamylphosphate synthetase -  
758 aspartate transcarbamylase multifunctional protein. *BMC Biochem* 5: 6

759 Stebbins JW, Zhang Y, Kantrowitz ER (1990) Importance of residues Arg-167 and  
760 Gln-231 in both the allosteric and catalytic mechanisms of *Escherichia coli* aspartate  
761 transcarbamoylase. *Biochemistry* 29: 3821-7

762 Swyryd EA, Seaver SS, Stark GR (1974) N (phosphonacetyl) L aspartate, a potent  
763 transition state analog inhibitor of aspartate transcarbamylase, Blocks proliferation of  
764 mammalian cells in culture. *Journal of Biological Chemistry* 249: 6945-6950

765 Trott O, Olson AJ (2010) AutoDock Vina: improving the speed and accuracy of  
766 docking with a new scoring function, efficient optimization, and multithreading. *J*

- 767 Comput Chem 31: 455-61
- 768 Tsuboi KK, Edmunds HN, Kwong LK (1977) Selective Inhibition of Pyrimidine  
769 Biosynthesis and Effect on Proliferative Growth of Colonic Cancer Cells. Cancer  
770 Research 37: 3080-3087
- 771 Wang J, Stieglitz KA, Cardia JP, Kantrowitz ER (2005) Structural basis for ordered  
772 substrate binding and cooperativity in aspartate transcarbamoylase. Proceedings of the  
773 National Academy of Sciences of the United States of America 102: 8881-6
- 774 Wang Q-S, Zhang K-H, Cui Y, Wang Z-J, Pan Q-Y, Liu K, Sun B, Zhou H, Li M-J,  
775 Xu Q, Xu C-Y, Yu F, He J-H (2018) Upgrade of macromolecular crystallography  
776 beamline BL17U1 at SSRF. Nuclear Science and Techniques 29: 68
- 777 West JM, Tsuruta H, Kantrowitz ER (2002) Stabilization of the R allosteric structure  
778 of Escherichia coli aspartate transcarbamoylase by disulfide bond formation. The  
779 Journal of biological chemistry 277: 47300-4
- 780 Wild JR, Loughrey-Chen SJ, Corder TS (1989) In the presence of CTP, UTP becomes  
781 an allosteric inhibitor of aspartate transcarbamoylase. Proceedings of the National  
782 Academy of Sciences of the United States of America 86: 46-50

783 **Figure legends**

784 **Figure 1. ATCase structures solved in this paper and sequences alignment of**  
785 **different ATCases.**

786 **A** The structure of R167/130's loop region of wild-type apo-ecATCase-holo solved in

787 this work, in which R167-out state is shown explicitly by electron density map  
788 (contoured at  $1.0 \sigma$ ). In this figure, R167/130's loop are shown as sticks, catalytic  
789 subunit in white, regulatory subunit in cyan, R167 in red and 130's loop in yellow.  
790 This coloring scheme is also used in other figures.

791 **B** Comparison between the wild-type apo-ecATCase-holo structure solved in this  
792 work (cyan) and a previously reported ecATCase-holo structure (PDB ID: 1ZA1,  
793 yellow), in which R167 adopts "out" and "in" state, respectively. 130's loop is also  
794 highlighted and the position of the active site is indicated by a docked PALA (sphere  
795 model) taken from another ATCase structure (PDB ID: 4KGV). For clarity,  
796 transparent cartoon model is used except for R167 and 130's loop and this transparent  
797 scheme is also used in other figures.

798 **C** Electron density maps of R167 and 130's loop in ATCase mutants. In each graph,  
799 G166 or P166, R167 and 130's loop are shown as sticks, and density maps were  
800 contoured at  $1.0 \sigma$ . From left to right, they are G166P ecATCase, G166P  
801 ecATCase-holo, G128A/G130A ecATCase and G128A/G130A ecATCase-holo.

802 **D** Sequence alignment of the ATCase segment containing R167 and 130's loop in  
803 different species, from viruses to animals. R167 and 130's loop are indicated by red  
804 star and red line, respectively. The additional glycine (G132) of huATCase is  
805 indicated by a red rectangle. See Appendix Fig S1 for the full-length alignment of  
806 selected organisms.

807



808 **Figure 2. Enzyme kinetics curve of different mutants of ecATCase,**  
809 **ecATCase-holo, and huATCase.**

810 In each graph, corresponding wild-type and R167A ATCase were used as positive and  
811 negative control, respectively. ATCases used for each group are: ecATCase (**A, D**),  
812 ecATCase-holo (**B, E**) and huATCase (**C, F**).

813

814 **Figure 3. MD simulation of R167 switch from “in” to “out” state and binding**  
815 **models of YD19 and YD21 with huATCase.**

816 **A, B** Structural comparison of the start and end models of the MD simulation for  
817 R167 switch in huATCase (PDB ID: 5G1N) and ecATCase (PDB ID: 4FYW),  
818 respectively. Important residues interacting with R167 in the conformational switch  
819 are labeled and shown as sticks. The switch is shown visibly in Movie EV1 and  
820 Movie EV2.

821 **C, D** The detailed binding models and interactions of YD19 and YD21 with  
822 huATCase. Compounds are shown as sticks together with transparent electrostatic  
823 surface of the protein (left). Residues involved in polar interactions with compounds  
824 are shown as sticks and labeled in black (right).

825

826 **Figure 4. Virtual compound screening workflow and enzyme inhibition assays of**  
827 **YD19 and YD21 compounds.**

828 **A** Computer-aided screening workflow. The chemical structures of five candidates

829 and two final decisions (in the blue rounded rectangle) are shown.

830 **B** IC<sub>50</sub> value of YD19 and YD21 for huATCase and ecATCase derived from **C**.

831 **C** IC<sub>50</sub> determination of YD19 and YD21 for huATCase and ecATCase. Datasets of

832 YD19 and YD21 were fitted with Dose-response equation and inhibition at 50% is

833 shown as a dashed line. YD20 was also tested and 5FU was used as a negative control

834 in each graph.

835

836 **Figure 5. Results of MTT cytotoxicity assay and xenograft mouse assay.**

837 **A** MTT cytotoxicity result of YD19, YD21, and 5FU in six cell lines. See Appendix

838 Fig S6 for full description of these cell lines.

839 **B** Tumor volume (left) and body weight (right) change of mice in different groups via

840 i.t. injection once every 2 days for total of 15 treatments.

841 **C** Final tumor pictures of different groups.

842 **D** Hematoxylin and eosin staining of tumor section in each group. Photographs at left

843 and right were amplified 40× (with a ruler 500 μm) and 100× (with a ruler 100 μm),

844 respectively.

845

846 **Figure 6. A model of newly discovered feedback regulatory mechanism of**

847 **ATCase and the resulting dual-targeting strategy for developing potential**

848 **anticancer drugs.**

849 The R167/130's loop region located at the interface acts as a modulator between

850 regulatory subunit and active site of ATCase, in response of the binding of  
851 pyrimidines or purines, which will further affect the active site, resulting in either  
852 inhibited or activated state of ATCase (top). Based on the newly found mechanism, a  
853 dual-targeting strategy was applied in developing potential anticancer drugs targeting  
854 huATCase, and the dual-targeting region was indicated by a semitransparent purple  
855 circle (bottom).

### 856 **Expanded View Figure legends**

857 **Figure EV1. Enzyme kinetics curve of ecATCase or ecATCase-holo and their**  
858 **mutants locked at R state.**

859 In each graph, corresponding wild-type and R167A ATCase are used as positive and  
860 negative control, respectively. ATCases used for each group are: ecATCase locked at  
861 R state by C47A/A241C mutations (**A, C**) and ecATCase-holo locked at R state by  
862 C47A/A241C mutations (**B, D**).

863

864 **Figure EV2. Important interactions with R167 and 130's loop in various**  
865 **ATCases.**

866 In each graph, PALA (colored in magenta) or residues directly involved in the  
867 interactions are shown as stick and labeled in black. All interactions were listed in  
868 Appendix Table S2 ATCases used for each graph are: apo-huATCase (PDB ID: 5G1O,  
869 **A**), PALA-huATCase (PDB ID: 5G1N, **B**), apo-ecATCase (PDB ID: 3CSU, **C**),

870 PALA-ecATCase (PDB ID: 1EKX, **D**), apo-ecATCase-holo solved in this work (**E**)  
871 and PALA-ecATCase-holo (PDB ID: 4KGV, **F**).

872

873 **Figure EV3. ITC results of ecATCase variants titrated by CP (top) and Asp after**  
874 **CP binding (bottom).**

875 In each assay, the concentration of CP and Asp used for titration is 500  $\mu\text{M}$ , and  
876 ATCase is 50  $\mu\text{M}$ . CP used to saturate ATCase is 4.8 mM.  $K_D$  is shown if binding  
877 curve can be fitted and other parameters were listed in Appendix Table S3. ATCases  
878 used for each group are: wild-type ecATCase (**A**), R167A ecATCase (**B**), G166P  
879 ecATCase (**C**) and G128A/G130A ecATCase (**D**).

880

881 **Figure EV4. ITC results of ecATCase-holo variants titrated by CP (top) and Asp**  
882 **after CP binding (bottom).**

883 In each assay, the concentration of CP and Asp used for titration is 500  $\mu\text{M}$ , and  
884 ATCase is 50  $\mu\text{M}$ . CP used to saturate ATCase is 4.8 mM.  $K_D$  is shown if binding  
885 curve can be fitted and other parameters were listed in Appendix Table S3. ATCases  
886 used for each group are: wild-type ecATCase-holo (**A**), R167A ecATCase-holo (**B**),  
887 G166P ecATCase-holo (**C**) and G128A/G130A ecATCase-holo (**D**).

888

889 **Figure EV5. MD simulation of R167 switch from “in” to “out” state in**  
890 **huATCase and ecATCase.**

891 **A** Energy comparison of seven ATCases with R167 “in” or “out” state. The first two  
892 are huATCase, the middle two are ecATCase, and the last three are ecATCase-holo, in  
893 which the one named “HOLO-out” used the structure of wild-type  
894 apo-ecATCase-holo with R167 “out” state solved in this research and the last one  
895 used the wild-type apo-ecATCase-holo (PDB ID: 4FYW) with R167 “in” state.

896 **B** Dynamic cross correlation heat map for R167 switch in huATCase (left, PDB ID:  
897 5G1N) and ecATCase-holo (right, PDB ID: 4FYW). The white boxes indicate  $C\alpha$   
898 correlation between R167 and 130’s loop.

## Figures

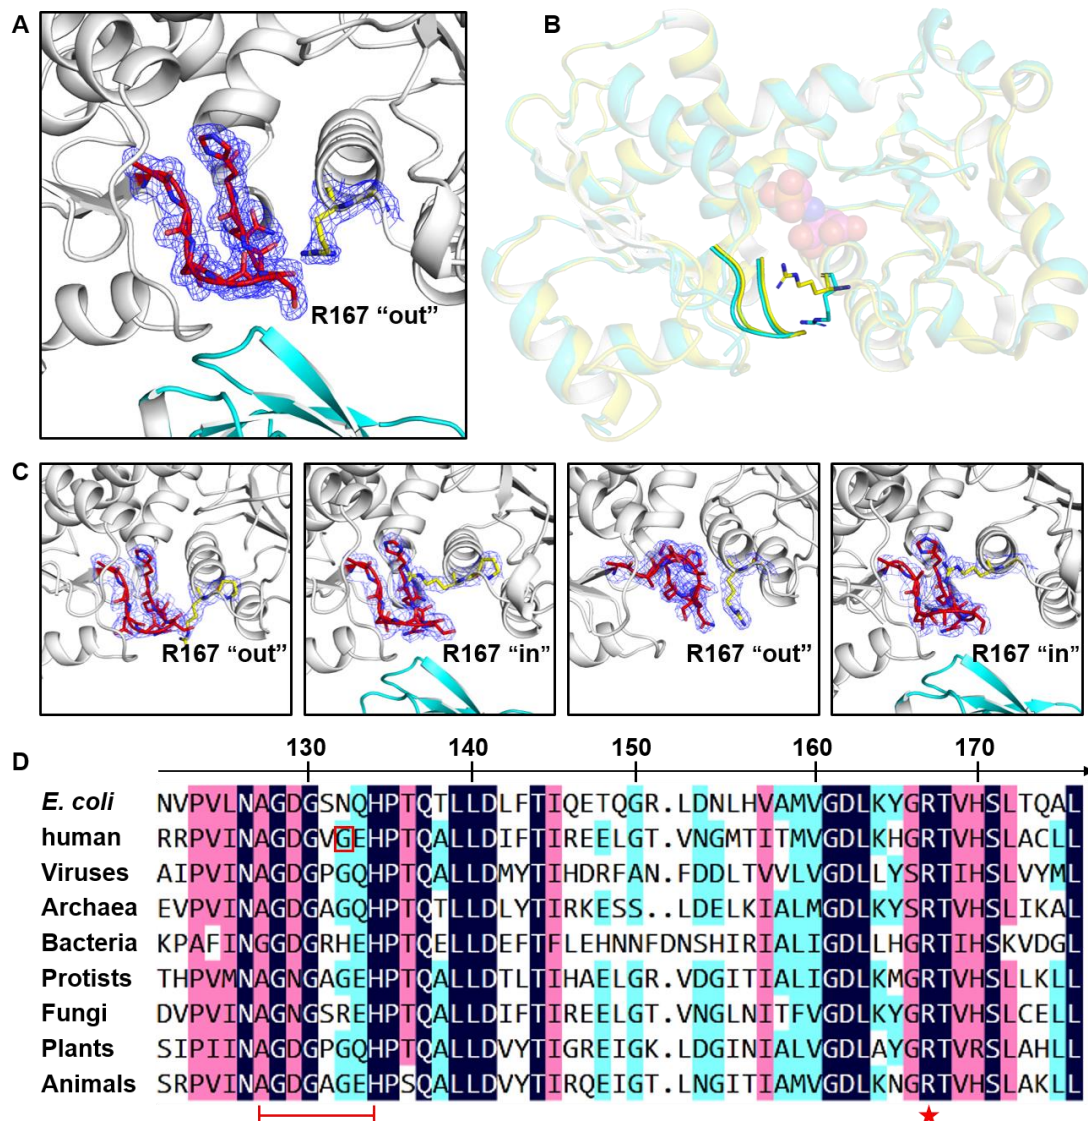

**Figure 1. ATCase structures solved in this paper and sequences alignment of different ATCases.**

**A** The structure of R167/130's loop region of wild-type apo-ecATCase-holo solved in this work, in which R167-out state is shown explicitly by electron density map (contoured at 1.0  $\sigma$ ). In this figure, R167/130's loop are shown as sticks, catalytic subunit in white, regulatory subunit in cyan, R167 in red and 130's loop in yellow. This coloring scheme is also used in other figures.

**B** Comparison between the wild-type apo-ecATCase-holo structure solved in this work (cyan) and a previously reported ecATCase-holo structure (PDB ID: 1ZA1, yellow), in which R167 adopts "out" and "in" state, respectively. 130's loop is also highlighted and the position of the active site is indicated by a docked PALA (sphere model) taken from another ATCase structure (PDB ID: 4KGV). For clarity, transparent cartoon model is used except for R167 and 130's loop and this transparent

scheme is also used in other figures.

**C** Electron density maps of R167 and 130's loop in ATCase mutants. In each graph, G166 or P166, R167 and 130's loop are shown as sticks, and density maps were contoured at 1.0  $\sigma$ . From left to right, they are G166P ecATCase, G166P ecATCase-holo, G128A/G130A ecATCase and G128A/G130A ecATCase-holo.

**D** Sequence alignment of the ATCase segment containing R167 and 130's loop in different species, from viruses to animals. R167 and 130's loop are indicated by red star and red line, respectively. The additional glycine (G132) of huATCase is indicated by a red rectangle. See Appendix Fig S1 for the full-length alignment of selected organisms.

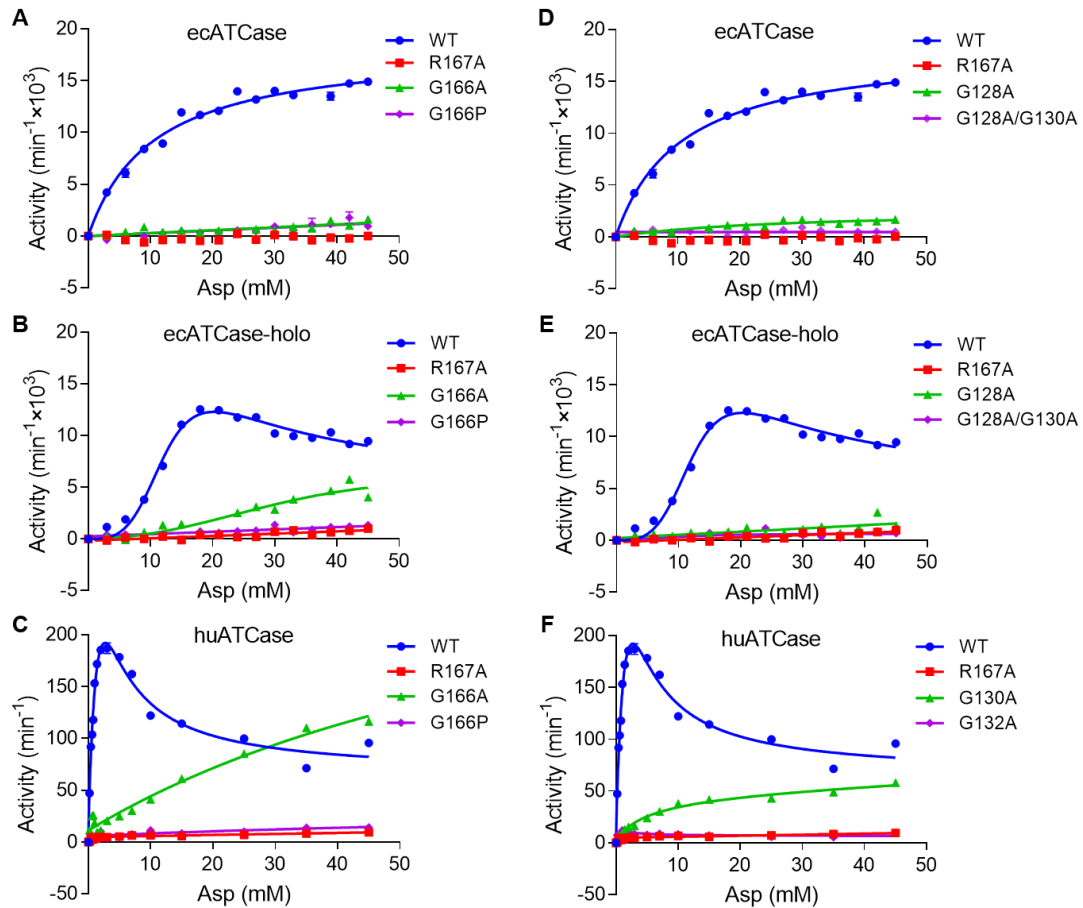

**Figure 2. Enzyme kinetics curve of different mutants of ecATCase, ecATCase-holo, and huATCase.**

In each graph, corresponding wild-type and R167A ATCase were used as positive and negative control, respectively. ATCases used for each group are: ecATCase (A, D), ecATCase-holo (B, E) and huATCase (C, F).



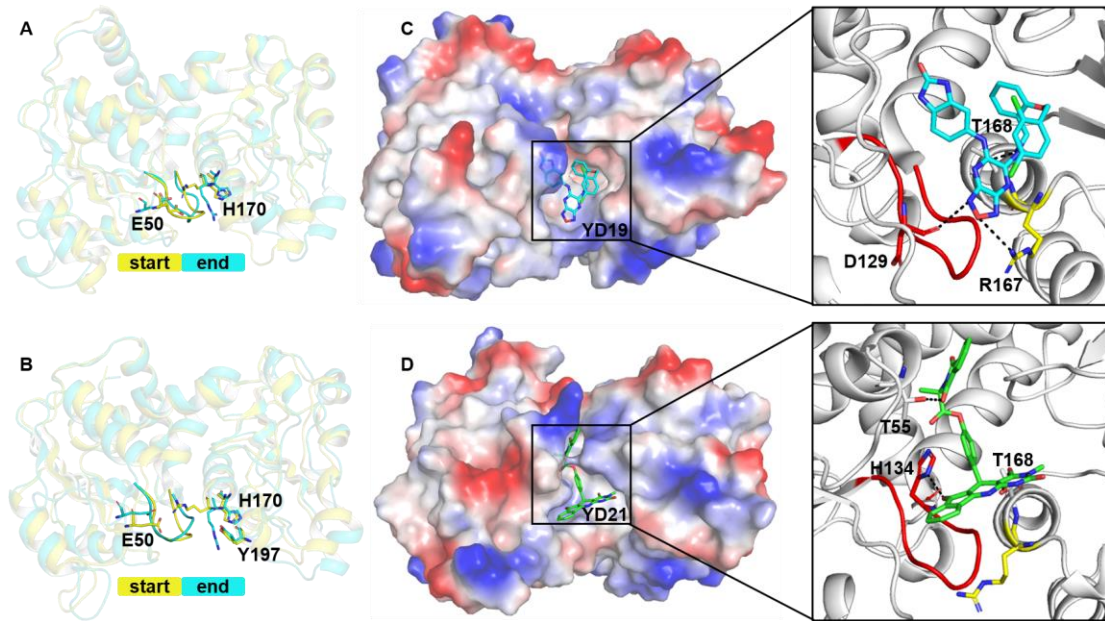

**Figure 3. MD simulation of R167 switch from “in” to “out” state and binding models of YD19 and YD21 with huATCase.**

**A, B** Structural comparison of the start and end models of the MD simulation for R167 switch in huATCase (PDB ID: 5G1N) and ecATCase (PDB ID: 4FYW), respectively. Important residues interacting with R167 in the conformational switch are labeled and shown as sticks. The switch is shown visibly in Movie EV1 and Movie EV2.

**C, D** The detailed binding models and interactions of YD19 and YD21 with huATCase. Compounds are shown as sticks together with transparent electrostatic surface of the protein (left). Residues involved in polar interactions with compounds are shown as sticks and labeled in black (right).

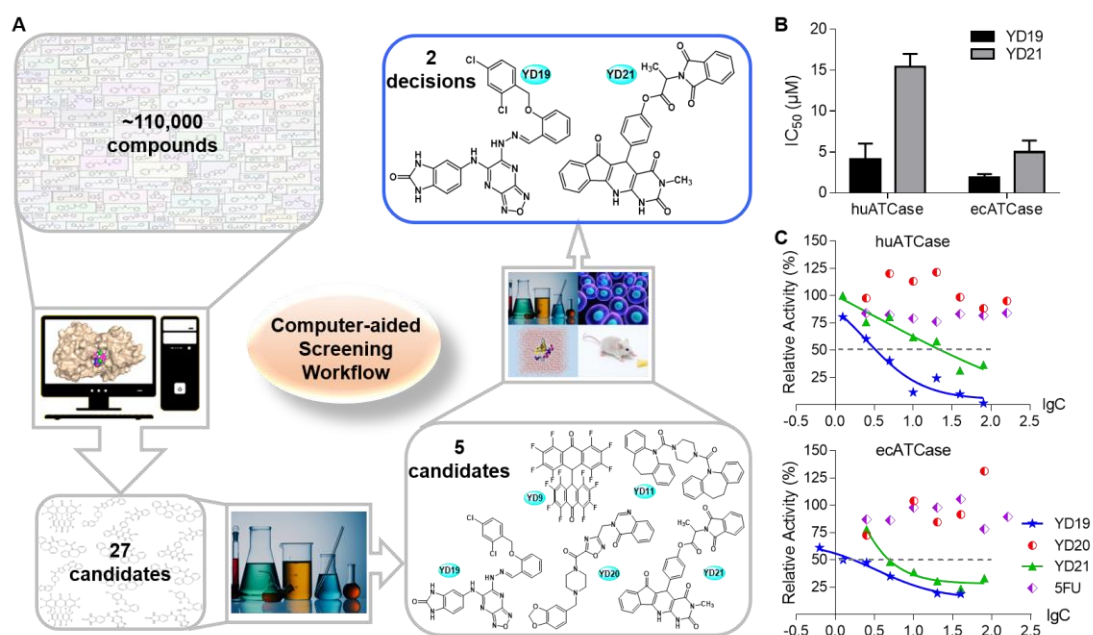

**Figure 4. Virtual compound screening workflow and enzyme inhibition assays of YD19 and YD21 compounds.**

**A** Computer-aided screening workflow. The chemical structures of five candidates and two final decisions (in the blue rounded rectangle) are shown.

**B**  $IC_{50}$  value of YD19 and YD21 for huATCase and ecATCase derived from **C**.

**C**  $IC_{50}$  determination of YD19 and YD21 for huATCase and ecATCase. Datasets of YD19 and YD21 were fitted with Dose-response equation and inhibition at 50% is shown as a dashed line. YD20 was also tested and 5FU was used as a negative control in each graph.

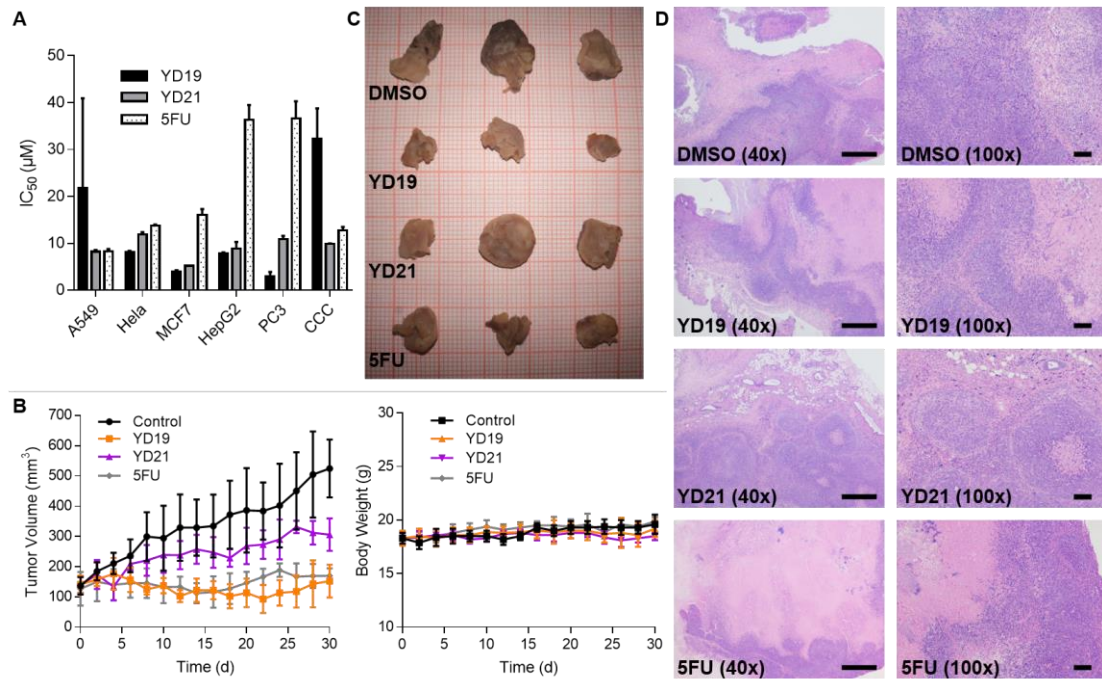

**Figure 5. Results of MTT cytotoxicity assay and xenograft mouse assay.**

**A** MTT cytotoxicity result of YD19, YD21, and 5FU in six cell lines. See Appendix Fig S6 for full description of these cell lines.

**B** Tumor volume (left) and body weight (right) change of mice in different groups via i.t. injection once every 2 days for total of 15 treatments.

**C** Final tumor pictures of different groups.

**D** Hematoxylin and eosin staining of tumor section in each group. Photographs at left and right were amplified 40× (with a ruler 500 µm) and 100× (with a ruler 100 µm), respectively.

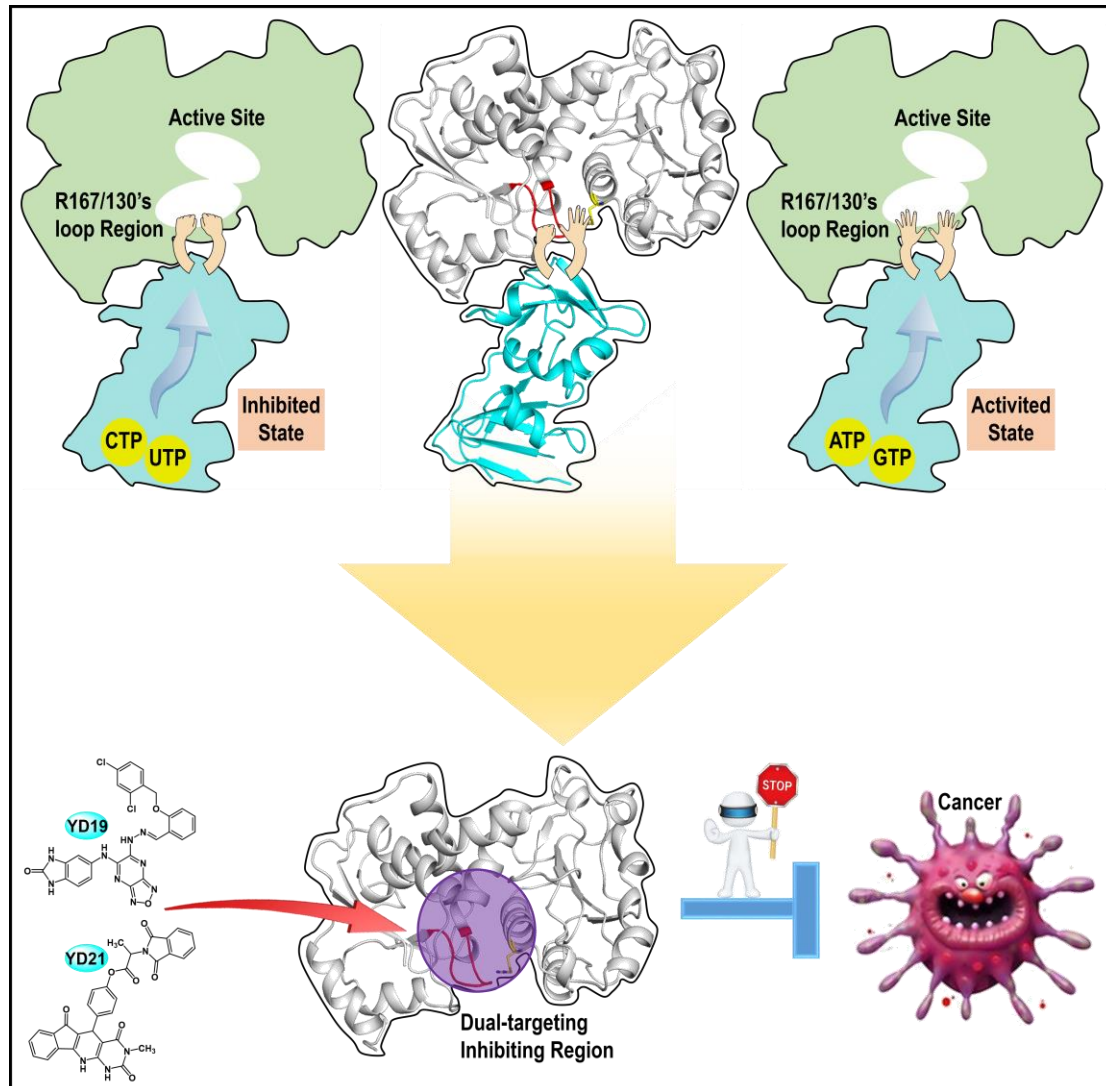

**Figure 6. A model of newly discovered feedback regulatory mechanism of ATCase and the resulting dual-targeting strategy for developing potential anticancer drugs.**

The R167/130's loop region located at the interface acts as a modulator between regulatory subunit and active site of ATCase, in response of the binding of pyrimidines or purines, which will further affect the active site, resulting in either inhibited or activated state of ATCase (top). Based on the newly found mechanism, a dual-targeting strategy was applied in developing potential anticancer drugs targeting huATCase, and the dual-targeting region was indicated by a semitransparent purple circle (bottom).

## Expanded View Figures, Tables and Movies

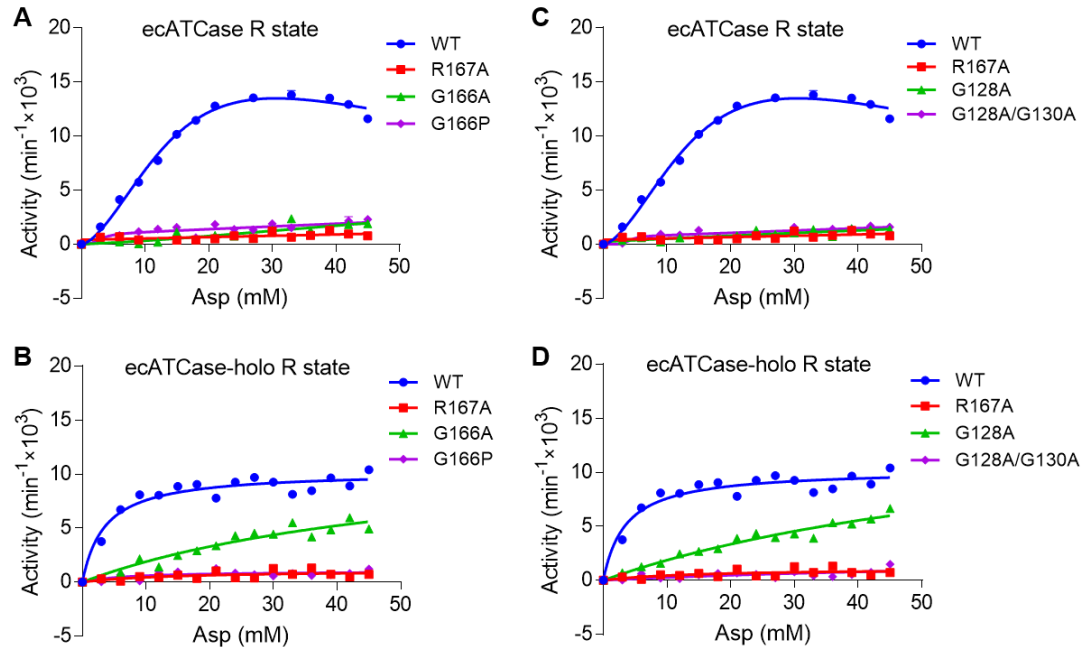

**Figure EV1. Enzyme kinetics curve of ecATCase or ecATCase-holo and their mutants locked at R state.**

In each graph, corresponding wild-type and R167A ATCase are used as positive and negative control, respectively. ATCases used for each group are: ecATCase locked at R state by C47A/A241C mutations (**A, C**) and ecATCase-holo locked at R state by C47A/A241C mutations (**B, D**).



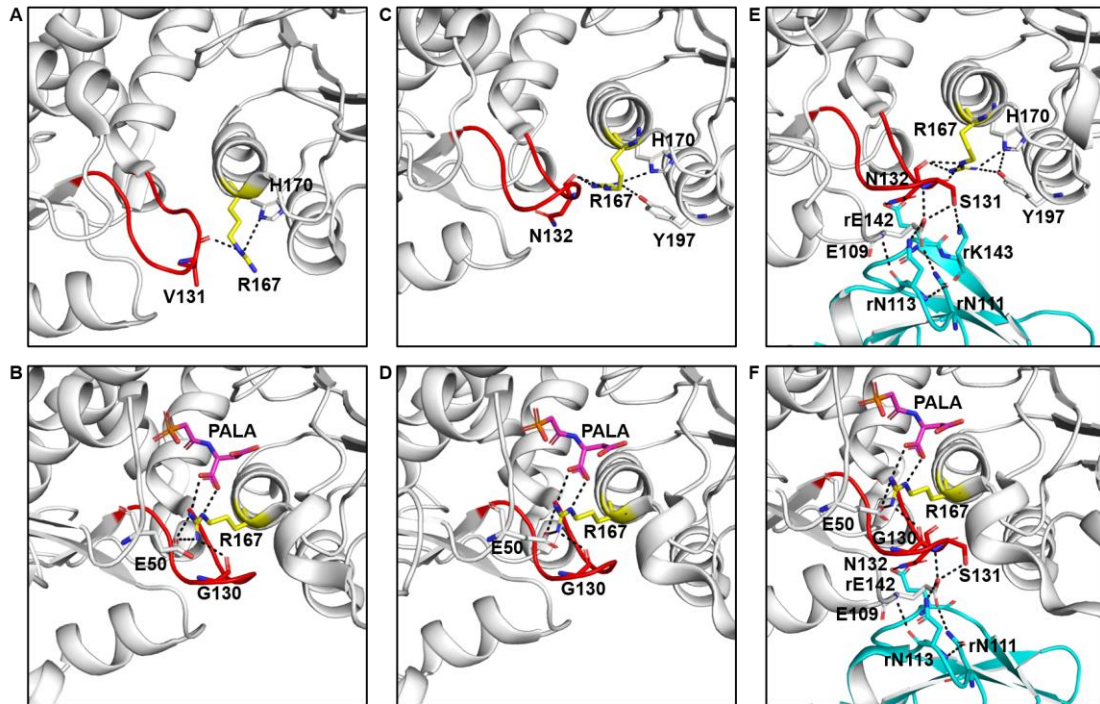

**Figure EV2. Important interactions with R167 and 130's loop in various ATCases.**

In each graph, PALA (colored in magenta) or residues directly involved in the interactions are shown as stick and labeled in black. All interactions were listed in Appendix Table S2 ATCases used for each graph are: apo-huATCase (PDB ID: 5G1O, **A**), PALA-huATCase (PDB ID: 5G1N, **B**), apo-ecATCase (PDB ID: 3CSU, **C**), PALA-ecATCase (PDB ID: 1EKX, **D**), apo-ecATCase-holo solved in this work (**E**) and PALA-ecATCase-holo (PDB ID: 4KGV, **F**).

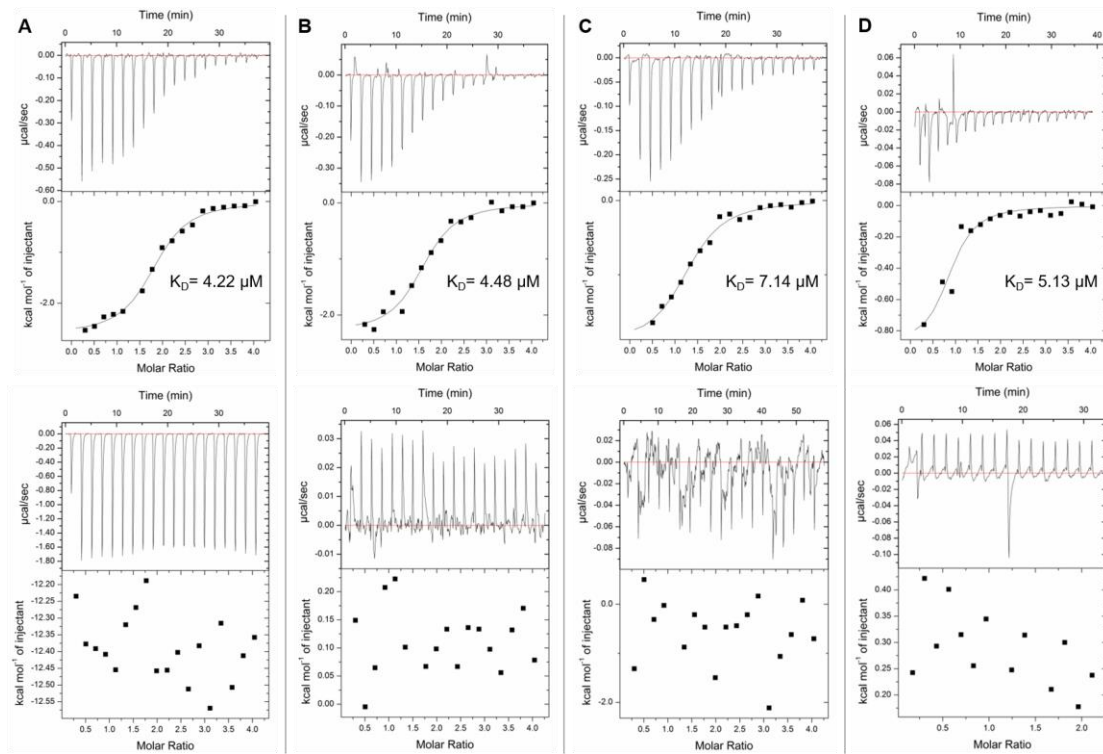

**Figure EV3. ITC results of ecATCase variants titrated by CP (top) and Asp after CP binding (bottom).**

In each assay, the concentration of CP and Asp used for titration is 500 µM, and ATCase is 50 µM. CP used to saturate ATCase is 4.8 mM. K<sub>D</sub> is shown if binding curve can be fitted and other parameters were listed in Appendix Table S3. ATCases used for each group are: wild-type ecATCase (A), R167A ecATCase (B), G166P ecATCase (C) and G128A/G130A ecATCase (D).

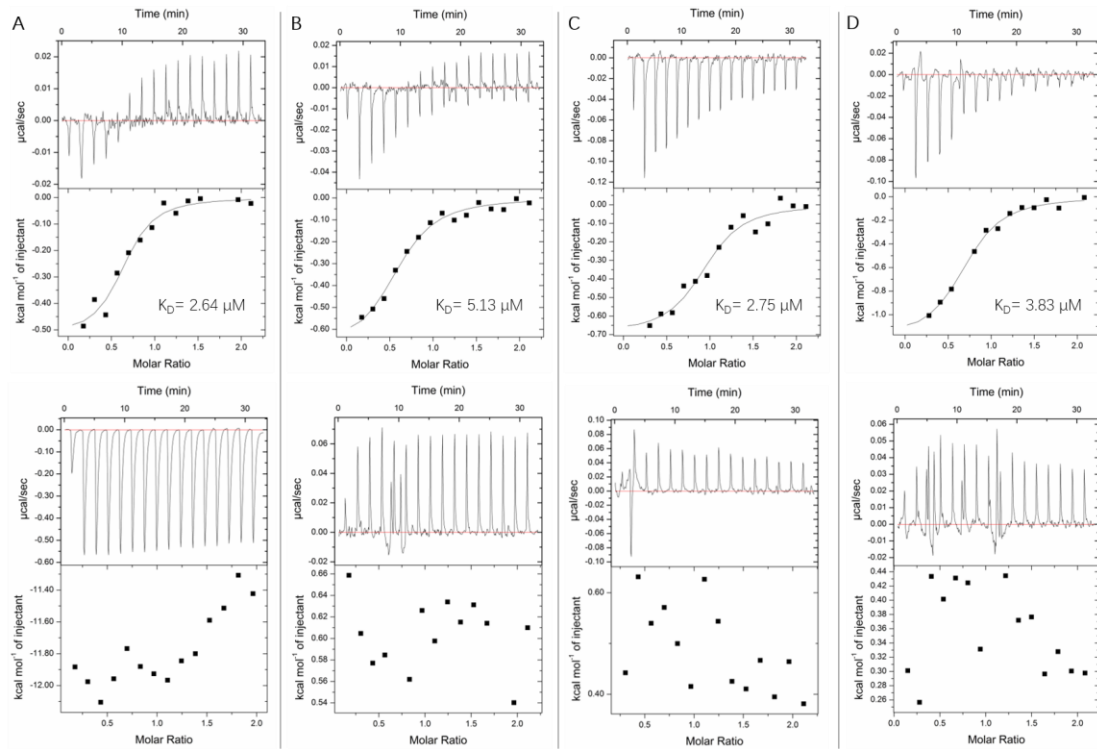

**Figure EV4. ITC results of ecATCase-holo variants titrated by CP (top) and Asp after CP binding (bottom).**

In each assay, the concentration of CP and Asp used for titration is 500  $\mu\text{M}$ , and ATCase is 50  $\mu\text{M}$ . CP used to saturate ATCase is 4.8 mM.  $K_D$  is shown if binding curve can be fitted and other parameters were listed in Appendix Table S3. ATCases used for each group are: wild-type ecATCase-holo (A), R167A ecATCase-holo (B), G166P ecATCase-holo (C) and G128A/G130A ecATCase-holo (D).



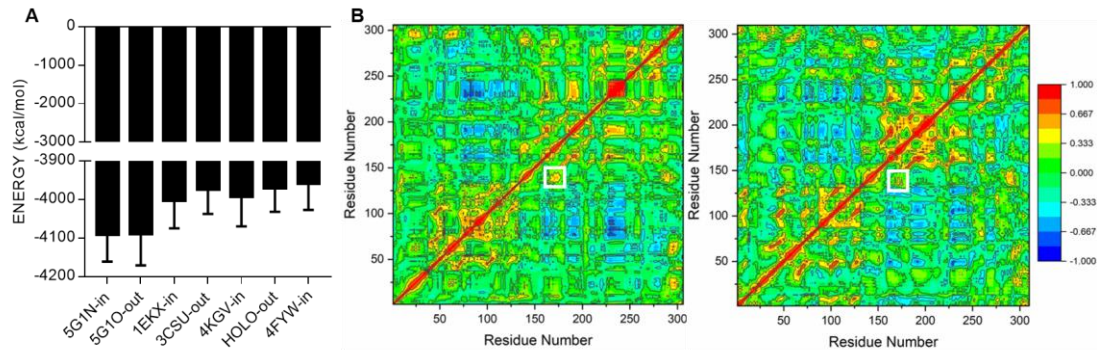

**Figure EV5. MD simulation of R167 switch from “in” to “out” state in huATCase and ecATCase.**

**A** Energy comparison of seven ATCases with R167 “in” or “out” state. The first two are huATCase, the middle two are ecATCase, and the last three are ecATCase-holo, in which the one named “HOLO-out” used the structure of wild-type apo-ecATCase-holo with R167 “out” state solved in this research and the last one used the wild-type apo-ecATCase-holo (PDB ID: 4FYW) with R167 “in” state.

**B** Dynamic cross correlation heat map for R167 switch in huATCase (left, PDB ID: 5G1N) and ecATCase-holo (right, PDB ID: 4FYW). The white boxes indicate Ca correlation between R167 and 130’s loop.

**Table EV1.  $V_{\max}$ ,  $K_m$ , and  $n_H$  of various ATCases.**

| <b>ATCase type</b>              | <b><math>V_{\max}</math> (<math>\text{min}^{-1}</math>)</b> | <b><math>K_m</math> (mM)</b> | <b><math>n_H^a</math></b> |
|---------------------------------|-------------------------------------------------------------|------------------------------|---------------------------|
| wild-type huATCase              | $219.7 \pm 11.2$                                            | $0.4 \pm 0.1$                | 1                         |
| wild-type ecATCase              | $(18.3 \pm 0.7) \times 10^3$                                | $10.0 \pm 1.6$               | 1                         |
| wild-type ecATCase R state      | $(14.6 \pm 0.5) \times 10^3$                                | $10.2 \pm 0.6$               | $2.5 \pm 0.4$             |
| wild-type ecATCase-holo         | $(16.1 \pm 3.3) \times 10^3$                                | $12.6 \pm 1.4$               | $4.0 \pm 1.3$             |
| wild-type ecATCase-holo R state | $(11.5 \pm 0.8) \times 10^3$                                | $4.9 \pm 1.1$                | 1                         |

<sup>a</sup> $n_H = 1$  means this data set was fitted with Michaelis-Menten equation, while others were fitted with Hill equation.

**Table EV2. Data collection and refinement statistics of five datasets of ecATCase or ecATCase-holo<sup>a</sup>.**

| item                                 | wild-type<br>holo         | G166P                    | G166P<br>holo             | G128A/G130A             | G128A/G130A<br>holo       |
|--------------------------------------|---------------------------|--------------------------|---------------------------|-------------------------|---------------------------|
| <b>Data collection statistics</b>    |                           |                          |                           |                         |                           |
| Wavelength<br>(Å)                    | 0.979                     | 1.542                    | 1.542                     | 1.542                   | 1.542                     |
| Space group                          | R32                       | R3                       | P3 <sub>2</sub> 21        | P2 <sub>1</sub>         | P3 <sub>2</sub> 21        |
| Resolution<br>(Å)                    | 30.8-2.1                  | 36.5-2.8                 | 47.9-3.0                  | 47.1-2.5                | 42.3-3.0                  |
|                                      | (2.1-2.1)                 | (2.9-2.8)                | (3.1-3.0)                 | (2.6-2.5)               | (3.1-3.0)                 |
| Unit cell                            |                           |                          |                           |                         |                           |
| a, b, c (Å)                          | 129.7,<br>129.7,<br>198.0 | 128.9,<br>128.9,<br>48.3 | 126.6,<br>126.6,<br>196.5 | 81.8,<br>96.7,<br>121.7 | 127.4,<br>127.4,<br>197.5 |
| $\alpha, \beta, \gamma$ (°)          | 90,<br>90,<br>120         | 90,<br>90,<br>120        | 90,<br>90,<br>120         | 90,<br>94,<br>90        | 90,<br>90,<br>120         |
| R <sub>meas</sub>                    | 0.127<br>(0.865)          | 0.096<br>(0.768)         | 0.180<br>(0.923)          | 0.105<br>(0.702)        | 0.113<br>(0.658)          |
| Average (I/σ)                        | 15.8 (3.0)                | 19.1 (2.5)               | 13.1 (2.5)                | 15.8 (2.6)              | 12.8 (2.4)                |
| Redundancy                           | 6.8 (7.3)                 | 3.3 (3.0)                | 8.8 (8.6)                 | 4.1 (4.0)               | 4.8 (4.5)                 |
| Completeness<br>(%)                  | 98.8 (95.8)               | 91.6 (63.0)              | 99.4 (97.2)               | 99.2 (93.7)             | 98.4 (95.8)               |
| <b>Refinement statistics</b>         |                           |                          |                           |                         |                           |
| Resolution<br>(Å)                    | 30.8-2.1                  | 36.5-2.8                 | 47.9-3.0                  | 47.1-2.5                | 42.3-3.0                  |
| Reflections                          | 270867<br>(29096)         | 22978<br>(2075)          | 325738<br>(31375)         | 270730<br>(25920)       | 175524<br>(15995)         |
| R <sub>work</sub> /R <sub>free</sub> | 0.18/0.21                 | 0.21/0.26                | 0.21/0.24                 | 0.19/0.23               | 0.24/0.27                 |
| Number of atoms                      |                           |                          |                           |                         |                           |
| protein                              | 3387                      | 2202                     | 10022                     | 13601                   | 10005                     |
| zinc                                 | 1                         | 0                        | 3                         | 0                       | 3                         |
| water                                | 326                       | 25                       | 28                        | 509                     | 17                        |
| RMS deviations                       |                           |                          |                           |                         |                           |
| bond<br>lengths (Å)                  | 0.006                     | 0.008                    | 0.004                     | 0.008                   | 0.004                     |
| angles (°)                           | 1.07                      | 1.30                     | 1.07                      | 1.23                    | 1.02                      |
| Mean B value<br>(Å <sup>2</sup> )    | 47.3                      | 49.0                     | 53.1                      | 45.0                    | 72.0                      |

<sup>a</sup>Values in parentheses correspond to the highest-resolution shell.

**Movie EV1. MD simulation of R167 switch from “in” to “out” state in huATCase.**

In this movie, R167, E50, and H170 are shown as sticks, in which E50 and H170 interact with R167 at “in” and “out” state, respectively. R167 and 130’s loop were colored in yellow and red, respectively. During this simulation, it can be observed that domain opening took place first, followed by gradual change of R167 from “in” to “out” state accompanied by the conformational change of 130’s loop.

**Movie EV2. MD simulation of R167 switch from “in” to “out” state in apo-ecATCase-holo.**

In this movie, R167, E50, H170, and Y197 are shown as sticks, in which E50 and H170/Y197 interact with R167 at “in” and “out” state, respectively. R167 and 130’s loop were colored in yellow and red, respectively. During this simulation, it can be observed that R167 gradually switches from “in” to “out” state accompanied by the conformational change of 130’s loop.
